# Supplementary material
Source: PubMed Central journal article supplement (PMC2670196)

**Supplementary Figure 2** - A region of the MHC, including BAK1 and HLA-DPA1, contains one of the top 20 candidates for selection based on the Long-Range Haplotype (LRH) test (Sabeti et al. 2002) in the YRI. Here we present the four haplotypes present at the tested region, showing the extended ancestral chromosome (Methods) on which each haplotype arose. Haplotype 1 is the putative selected haplotypes and shows a great extent of the ancestral chromosome in comparison to the other alleles present in YRI at the locus.

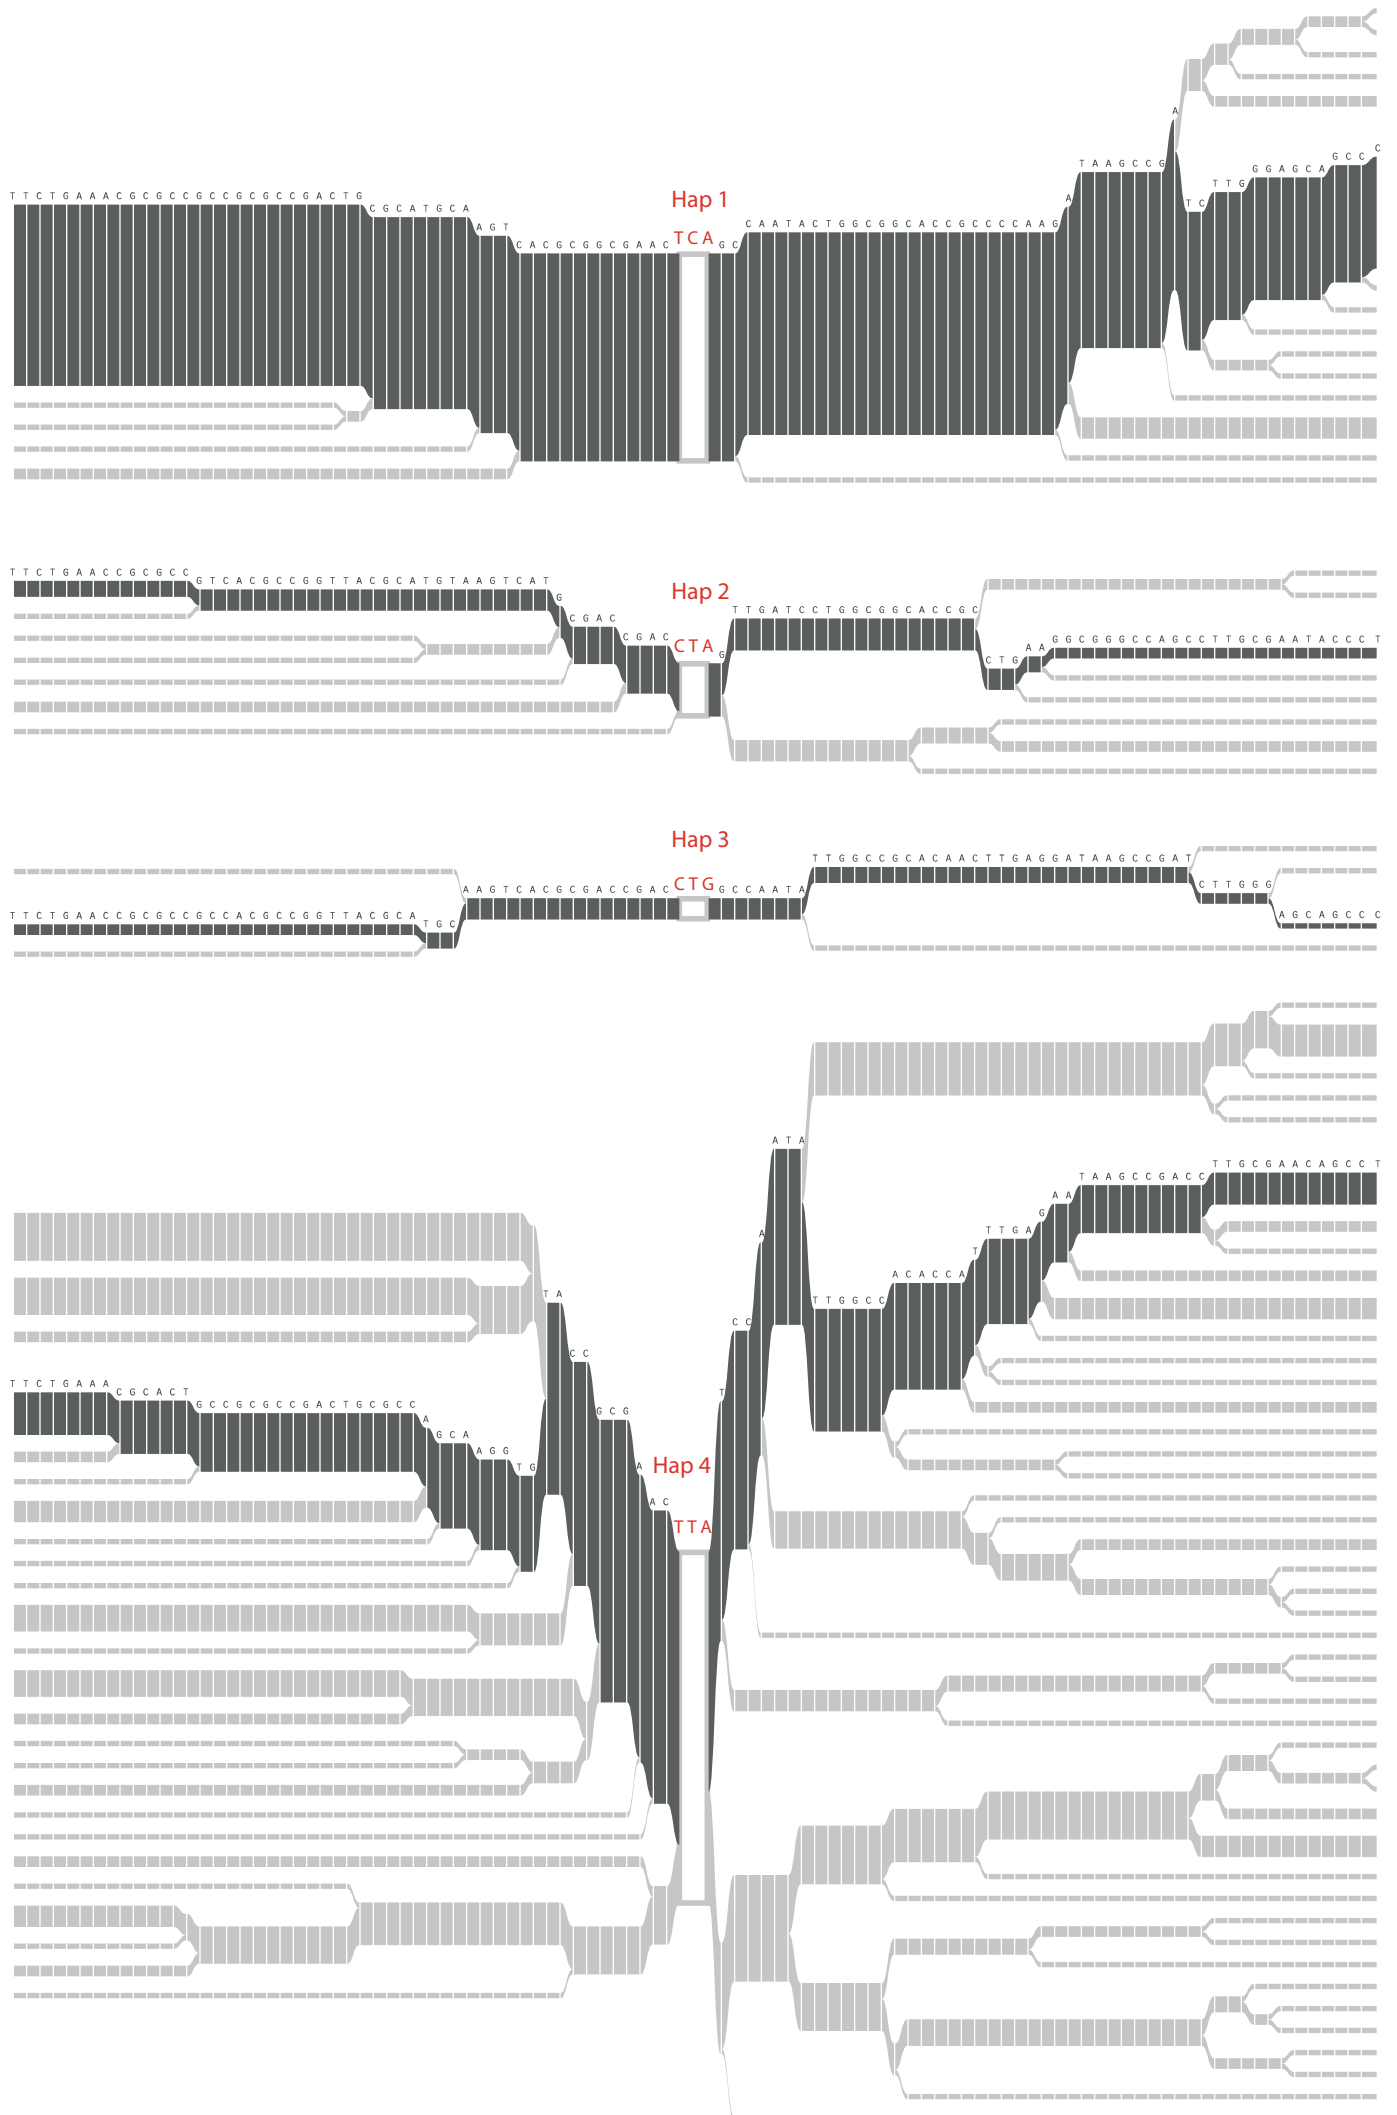

Supplement: NIHMS4414-supplement-Fig_2.pdf [file NIHMS4414-supplement-Fig_2.pdf]
