# Supplementary material
Source: PubMed Central journal article supplement (PMC2670196)
Supplement: NIHMS4414-supplement-Table_2.pdf [file NIHMS4414-supplement-Table_2.pdf]

Supplementary Table 2 - Correlations between alleles at the six classical HLA loci typed in the study. Cells show P-value as assessed by permutation. Colors indicate significance level: P>0.05 (blue), 0.05>P>0.01 (orange), P<0.01 (red).

| YR I     |       |       |          |         |         |
|----------|-------|-------|----------|---------|---------|
|          | HLA-C | HLA-B | HLA-DR B | HLA-DQA | HLA-DQB |
| HLA-A    | 0.212 | 0.047 | 0.554    | 0.358   | 0.45    |
| HLA-C    |       | 0     | 0.106    | 0.003   | 0.006   |
| HLA-B    |       |       | 0.056    | 0       | 0.057   |
| HLA-DR B |       |       |          | 0       | 0       |
| HLA-DQA  |       |       |          |         | 0       |

  

| CE U     |       |       |          |         |         |
|----------|-------|-------|----------|---------|---------|
|          | HLA-C | HLA-B | HLA-DR B | HLA-DQA | HLA-DQB |
| HLA-A    | 0     | 0     | 0.257    | 0.03    | 0.03    |
| HLA-C    |       | 0     | 0        | 0       | 0.004   |
| HLA-B    |       |       | 0        | 0       | 0.003   |
| HLA-DR B |       |       |          | 0       | 0       |
| HLA-DQA  |       |       |          |         | 0       |

  

| CHB      |       |       |          |         |         |
|----------|-------|-------|----------|---------|---------|
|          | HLA-C | HLA-B | HLA-DR B | HLA-DQA | HLA-DQB |
| HLA-A    | 0.004 | 0     | 0.043    | 0.425   | 0.059   |
| HLA-C    |       | 0     | 0.504    | 0.744   | 0.388   |
| HLA-B    |       |       | 0.002    | 0.541   | 0.001   |
| HLA-DR B |       |       |          | 0.021   | 0       |
| HLA-DQA  |       |       |          |         | 0       |

  

| J P T    |       |       |          |         |         |
|----------|-------|-------|----------|---------|---------|
|          | HLA-C | HLA-B | HLA-DR B | HLA-DQA | HLA-DQB |
| HLA-A    | 0.317 | 0.151 | 0.134    | 0.042   | 0.146   |
| HLA-C    |       | 0.002 | 0.033    | 0.698   | 0.077   |
| HLA-B    |       |       | 0.009    | 0.001   | 0       |
| HLA-DR B |       |       |          | 0       | 0       |
| HLA-DQA  |       |       |          |         | 0       |
