# Supplementary material
Source: PubMed Central journal article supplement (PMC2670196)
Supplement: NIHMS4414-supplement-Table_3.pdf [file NIHMS4414-supplement-Table_3.pdf]

Supplementary Table 3 - List of tags for HLA alleles

Note that the listed tag SNP or haplotype test based on multiple SNPs does not necessarily represent the best test. Due to the correlations between SNPs, there are likely to exist many equivalent tags or haplotypes to capture any given HLA allele. Please check the web-based resources listed in the URL section of the manuscript for updates.

## YRI

| HLA allele | frequency | tags                          | allele | frequency | rsquared | dprime |
|------------|-----------|-------------------------------|--------|-----------|----------|--------|
| HLA-A*0101 | 0.0167    | rs10807055,rs2844775          | 1,1    | 0.017     | 1.000    | 1.000  |
| HLA-A*0201 | 0.0417    | rs4713240,rs3132682           | 3,2    | 0.042     | 1.000    | 1.000  |
| HLA-A*0202 | 0.0250    | rs9261488,rs3094636           | 4,2    | 0.025     | 1.000    | 1.000  |
| HLA-A*0205 | 0.0167    | rs2523734,rs3132672           | 3,4    | 0.017     | 1.000    | 1.000  |
| HLA-A*0211 | 0.0083    | rs7452887,rs968909            | 2,1    | 0.017     | 0.496    | 1.000  |
| HLA-A*0301 | 0.1250    | rs2524024                     | 1      | 0.125     | 1.000    | 1.000  |
| HLA-A*2301 | 0.1083    | rs2394186,rs1611717           | 2,2    | 0.108     | 1.000    | 1.000  |
| HLA-A*2424 | 0.0083    | rs1264362                     | 2      | 0.017     | 0.496    | 0.992  |
| HLA-A*2601 | 0.0250    | rs3823339                     | 3      | 0.025     | 1.000    | 1.000  |
| HLA-A*2902 | 0.0167    | rs7741100,rs2523807           | 3,2    | 0.017     | 1.000    | 1.000  |
| HLA-A*3001 | 0.0917    | rs1633005,rs2057727           | 4,4    | 0.092     | 1.000    | 1.000  |
| HLA-A*3002 | 0.0500    | rs2844846,rs2517671           | 1,2    | 0.050     | 1.000    | 1.000  |
| HLA-A*3201 | 0.0083    | rs3873243                     | 2      | 0.008     | 1.000    | 1.000  |
| HLA-A*3301 | 0.0250    | rs7749944                     | 4      | 0.025     | 1.000    | 1.000  |
| HLA-A*3303 | 0.1083    | rs6921921,rs2523945           | 1,3    | 0.108     | 1.000    | 1.000  |
| HLA-A*3402 | 0.0417    | rs1610606,rs4959036           | 2,3    | 0.042     | 1.000    | 1.000  |
| HLA-A*3601 | 0.1417    | rs259940,rs261943             | 3,3    | 0.142     | 1.000    | 1.000  |
| HLA-A*6602 | 0.0167    | rs3115592,rs2523960           | 1,3    | 0.017     | 1.000    | 1.000  |
| HLA-A*6801 | 0.0167    | rs2735068,rs2524198           | 2,2    | 0.017     | 1.000    | 1.000  |
| HLA-A*6802 | 0.0583    | rs6457116                     | 2      | 0.058     | 1.000    | 1.000  |
| HLA-A*7401 | 0.0417    | rs9468675                     | 2      | 0.042     | 1.000    | 1.000  |
| HLA-A*8001 | 0.0083    | rs1235162                     | 4      | 0.008     | 1.000    | 1.000  |
| HLA-B*0702 | 0.0750    | rs2523618                     | 4      | 0.075     | 1.000    | 1.000  |
| HLA-B*0801 | 0.0083    | rs1059612                     | 2      | 0.008     | 1.000    | 1.000  |
| HLA-B*1302 | 0.0250    | rs397596                      | 1      | 0.025     | 1.000    | 1.000  |
| HLA-B*1401 | 0.0083    | rs1264308                     | 2      | 0.017     | 0.496    | 0.992  |
| HLA-B*1402 | 0.0083    | rs2734331                     | 1      | 0.008     | 1.000    | 1.000  |
| HLA-B*1403 | 0.0083    | rs2524229                     | 4      | 0.017     | 0.496    | 0.992  |
| HLA-B*1503 | 0.0583    | rs3819294,rs2844533           | 1,2    | 0.058     | 1.000    | 1.000  |
| HLA-B*1510 | 0.0833    | rs3819294,rs2523638           | 1,3    | 0.083     | 1.000    | 1.000  |
| HLA-B*1516 | 0.0083    | rs7776044,rs2736157           | 1,3    | 0.017     | 0.496    | 1.000  |
| HLA-B*1801 | 0.0500    | rs1051791                     | 2      | 0.050     | 1.000    | 1.000  |
| HLA-B*3501 | 0.0833    | rs2249876,rs1058026,rs2844498 | 4,2,2  | 0.083     | 1.000    | 1.000  |
| HLA-B*3903 | 0.0083    | rs3094111,rs2233969           | 1,3    | 0.017     | 0.496    | 1.000  |
| HLA-B*3910 | 0.0083    | rs6929434                     | 4      | 0.008     | 1.000    | 1.000  |
| HLA-B*4201 | 0.0750    | rs5875311,rs2273017           | 3,3    | 0.075     | 1.000    | 1.000  |
| HLA-B*4202 | 0.0083    | rs9469052                     | 2      | 0.017     | 0.496    | 0.992  |
| HLA-B*4403 | 0.0167    | rs2769                        | 2      | 0.017     | 1.000    | 1.000  |
| HLA-B*4501 | 0.0167    | rs7453631                     | 4      | 0.017     | 1.000    | 1.000  |
| HLA-B*4901 | 0.0500    | rs9368673,rs11967289          | 2,4    | 0.050     | 1.000    | 1.000  |
| HLA-B*5101 | 0.0417    | rs2523451,rs4569,rs379464     | 4,3,3  | 0.033     | 0.793    | 1.000  |
| HLA-B*5201 | 0.0833    | rs2394401,rs7747738,rs2256965 | 1,1,4  | 0.083     | 1.000    | 1.000  |
| HLA-B*5301 | 0.1583    | rs2844535,rs6940467           | 2,3    | 0.150     | 0.938    | 1.000  |
| HLA-B*5601 | 0.0083    | rs4122190                     | 1      | 0.008     | 1.000    | 1.000  |
| HLA-B*5702 | 0.0083    | rs2246626,rs2071278           | 3,3    | 0.017     | 0.496    | 1.000  |
| HLA-B*5703 | 0.0250    | rs7451258,rs3998357,rs2523586 | 2,3,4  | 0.025     | 1.000    | 1.000  |
| HLA-B*5801 | 0.0583    | rs1058026,rs2523608,rs6929932 | 1,4,4  | 0.067     | 0.867    | 1.000  |
| HLA-B*7801 | 0.0083    | rs3130116                     | 4      | 0.017     | 0.496    | 0.992  |
| HLA-B*8101 | 0.0083    | rs9261947,rs2853925           | 1,2    | 0.017     | 0.496    | 1.000  |
| HLA-C*0102 | 0.0083    | rs4122190                     | 1      | 0.008     | 1.000    | 1.000  |
| HLA-C*0202 | 0.0917    | rs6923313,rs2243868           | 3,3    | 0.092     | 1.000    | 1.000  |
| HLA-C*0302 | 0.0417    | rs2074488                     | 3      | 0.042     | 1.000    | 1.000  |
| HLA-C*0401 | 0.2500    | rs4386816                     | 4      | 0.250     | 1.000    | 1.000  |
| HLA-C*0501 | 0.0083    | rs7762619                     | 4      | 0.008     | 1.000    | 1.000  |
| HLA-C*0602 | 0.0083    | rs12198655                    | 3      | 0.017     | 0.496    | 0.992  |
| HLA-C*0701 | 0.1333    | rs3132499,rs2524074           | 1,2    | 0.133     | 1.000    | 1.000  |
| HLA-C*0702 | 0.0583    | rs9264731                     | 1      | 0.058     | 1.000    | 1.000  |

Supplementary Table 3 - List of tags for HLA alleles

|              |        |                                |       |       |       |       |
|--------------|--------|--------------------------------|-------|-------|-------|-------|
| HLA-C*0802   | 0.0500 | rs2524100,rs652888             | 3,1   | 0.050 | 1.000 | 1.000 |
| HLA-C*0804   | 0.0500 | rs1265180,rs2523554            | 1,3   | 0.050 | 1.000 | 1.000 |
| HLA-C*1203   | 0.0083 | rs6929434                      | 4     | 0.008 | 1.000 | 1.000 |
| HLA-C*1402   | 0.0083 | rs6457259,rs2535293            | 2,2   | 0.017 | 0.496 | 1.000 |
| HLA-C*1505   | 0.0167 | rs3216869,rs7381371            | 2,4   | 0.017 | 1.000 | 1.000 |
| HLA-C*1601   | 0.1667 | rs2844603,rs2844586            | 3,1   | 0.167 | 0.884 | 0.940 |
| HLA-C*1701   | 0.0833 | rs2524069,rs5875311,rs3096702  | 1,3,2 | 0.075 | 0.892 | 1.000 |
| HLA-C*1801   | 0.0167 | rs2524040,rs2524089            | 3,3   | 0.017 | 1.000 | 1.000 |
| HLA-DQA*0101 | 0.1000 | rs3134605,rs2858330,rs1612904  | 1,1,1 | 0.108 | 0.915 | 1.000 |
| HLA-DQA*0102 | 0.2417 | rs204996,rs6457594,rs1063355   | 3,1,1 | 0.233 | 0.704 | 0.859 |
| HLA-DQA*0103 | 0.0833 | rs3135338,rs2858867,rs5875382  | 1,4,1 | 0.083 | 1.000 | 1.000 |
| HLA-DQA*0201 | 0.1500 | rs3844313,rs2647012            | 1,2   | 0.150 | 1.000 | 1.000 |
| HLA-DQA*0301 | 0.0583 | rs5875382,rs6457617            | 3,1   | 0.058 | 1.000 | 1.000 |
| HLA-DQA*0401 | 0.1333 | rs4639334,rs1061172            | 2,3   | 0.133 | 1.000 | 1.000 |
| HLA-DQA*0501 | 0.2333 | rs4424079,rs2284189            | 3,1   | 0.233 | 0.822 | 0.907 |
| HLA-DQB*0201 | 0.2750 | rs4988889                      | 3     | 0.275 | 1.000 | 1.000 |
| HLA-DQB*0301 | 0.1750 | rs6928482,rs1056315            | 3,1   | 0.175 | 1.000 | 1.000 |
| HLA-DQB*0302 | 0.0167 | rs7454108                      | 4     | 0.017 | 1.000 | 1.000 |
| HLA-DQB*0402 | 0.1083 | rs2213586,rs4947342            | 4,4   | 0.108 | 1.000 | 1.000 |
| HLA-DQB*0501 | 0.1250 | rs6457614                      | 1     | 0.125 | 1.000 | 1.000 |
| HLA-DQB*0502 | 0.0583 | rs3129718                      | 3     | 0.058 | 1.000 | 1.000 |
| HLA-DQB*0503 | 0.0250 | rs1612904,rs2856717            | 1,4   | 0.025 | 1.000 | 1.000 |
| HLA-DQB*0602 | 0.1000 | rs5875382,rs3134975            | 3,4   | 0.117 | 0.841 | 1.000 |
| HLA-DQB*0603 | 0.0583 | rs3135006,rs3918153,rs210139   | 4,2,3 | 0.067 | 0.867 | 1.000 |
| HLA-DQB*0604 | 0.0167 | rs3129848,rs2858867,rs1978029  | 4,2,4 | 0.017 | 1.000 | 1.000 |
| HLA-DQB*0605 | 0.0417 | rs419132,rs2157051,rs5021448   | 3,3,4 | 0.042 | 1.000 | 1.000 |
| HLA-DRB*0101 | 0.0167 | rs439844,rs3135391             | 3,4   | 0.017 | 1.000 | 1.000 |
| HLA-DRB*0102 | 0.0333 | rs2187818,rs14004              | 2,4   | 0.033 | 1.000 | 1.000 |
| HLA-DRB*0301 | 0.0917 | rs3129763,rs9275229,rs9277489  | 4,4,1 | 0.083 | 0.713 | 0.890 |
| HLA-DRB*0302 | 0.0917 | rs3129878,rs4599680,rs7764856  | 3,3,1 | 0.092 | 1.000 | 1.000 |
| HLA-DRB*0403 | 0.0083 | rs1800624                      | 4     | 0.008 | 1.000 | 1.000 |
| HLA-DRB*0701 | 0.1250 | rs1800624,rs3828846,rs2647045  | 4,2,1 | 0.125 | 0.853 | 0.924 |
| HLA-DRB*0804 | 0.0750 | rs5077778,rs3129954,rs1061172  | 1,2,3 | 0.083 | 0.892 | 1.000 |
| HLA-DRB*0901 | 0.0250 | rs2242656,rs1061808,rs2395185  | 1,4,1 | 0.025 | 1.000 | 1.000 |
| HLA-DRB*1101 | 0.0583 | rs2395150,rs12191360,rs4713559 | 4,2,4 | 0.058 | 1.000 | 1.000 |
| HLA-DRB*1102 | 0.0250 | rs2395153,rs241424,rs2072915   | 2,3,1 | 0.025 | 1.000 | 1.000 |
| HLA-DRB*1104 | 0.0750 | rs558702,rs7744293             | 1,1   | 0.050 | 0.649 | 1.000 |
| HLA-DRB*1201 | 0.0167 | rs4248166,rs6918223            | 2,2   | 0.017 | 1.000 | 1.000 |
| HLA-DRB*1301 | 0.0833 | rs3134942,rs3763308,rs7451962  | 3,4,2 | 0.100 | 0.818 | 1.000 |
| HLA-DRB*1302 | 0.0583 | rs2157339,rs7756467            | 1,4   | 0.058 | 1.000 | 1.000 |
| HLA-DRB*1303 | 0.0750 | rs11756657,rs2516049,rs2856718 | 3,2,1 | 0.075 | 1.000 | 1.000 |
| HLA-DRB*1327 | 0.0083 | rs2894239,rs9368757            | 3,1   | 0.017 | 0.496 | 1.000 |
| HLA-DRB*1335 | 0.0083 | rs2982277                      | 2     | 0.008 | 1.000 | 1.000 |
| HLA-DRB*1401 | 0.0250 | rs1612904,rs2856717            | 1,4   | 0.025 | 1.000 | 1.000 |
| HLA-DRB*1501 | 0.0083 | rs443623                       | 1     | 0.008 | 1.000 | 1.000 |
| HLA-DRB*1503 | 0.0917 | rs12191360,rs4599680           | 2,1   | 0.100 | 0.908 | 1.000 |

## CEU

| HLA allele | frequency | tags                 | allele | frequency | rsquared | dprime |
|------------|-----------|----------------------|--------|-----------|----------|--------|
| HLA-A*0101 | 0.1889    | rs1611635,rs10947088 | 4,4    | 0.183     | 0.964    | 1.000  |
| HLA-A*0201 | 0.3278    | rs2844821,rs762324   | 3,2    | 0.350     | 0.906    | 1.000  |
| HLA-A*0205 | 0.0111    | rs6906270            | 2      | 0.011     | 1.000    | 1.000  |
| HLA-A*0206 | 0.0056    | rs3116820,rs6457109  | 3,3    | 0.011     | 0.497    | 1.000  |
| HLA-A*0301 | 0.0944    | rs9380122,rs9259817  | 4,2    | 0.100     | 0.939    | 1.000  |
| HLA-A*1101 | 0.0389    | rs29233              | 2      | 0.039     | 1.000    | 1.000  |
| HLA-A*2301 | 0.0167    | rs3025623,rs2534825  | 4,3    | 0.017     | 1.000    | 1.000  |
| HLA-A*2402 | 0.0889    | rs3893538,rs2523933  | 2,1    | 0.094     | 0.935    | 1.000  |
| HLA-A*2403 | 0.0056    | rs362527,rs4071986   | 3,4    | 0.011     | 0.497    | 1.000  |
| HLA-A*2501 | 0.0389    | rs3835309,rs3094121  | 1,1    | 0.039     | 1.000    | 1.000  |
| HLA-A*2601 | 0.0222    | rs2301751,rs4678     | 4,2    | 0.022     | 1.000    | 1.000  |
| HLA-A*2902 | 0.0167    | rs7453068,rs2844659  | 1,1    | 0.017     | 1.000    | 1.000  |
| HLA-A*3001 | 0.0056    | rs11961013           | 3      | 0.006     | 1.000    | 1.000  |
| HLA-A*3002 | 0.0056    | rs29243              | 2      | 0.006     | 1.000    | 1.000  |

Supplementary Table 3 - List of tags for HLA alleles

|              |        |                               |       |       |       |       |
|--------------|--------|-------------------------------|-------|-------|-------|-------|
| HLA-A*3101   | 0.0333 | rs1061235                     | 4     | 0.033 | 1.000 | 1.000 |
| HLA-A*3201   | 0.0278 | rs1611578,rs3130244           | 3,2   | 0.028 | 1.000 | 1.000 |
| HLA-A*6801   | 0.0333 | rs1610714,rs2571375           | 3,3   | 0.033 | 1.000 | 1.000 |
| HLA-B*0702   | 0.1833 | rs2596438,rs805288            | 3,2   | 0.189 | 0.964 | 1.000 |
| HLA-B*0801   | 0.1389 | rs6457374,rs2844535           | 3,2   | 0.139 | 0.909 | 0.954 |
| HLA-B*1302   | 0.0167 | rs12191164                    | 3     | 0.017 | 1.000 | 1.000 |
| HLA-B*1401   | 0.0056 | rs12208550                    | 3     | 0.006 | 1.000 | 1.000 |
| HLA-B*1402   | 0.0111 | rs2524160,rs9368673           | 4,2   | 0.011 | 1.000 | 1.000 |
| HLA-B*1501   | 0.0722 | rs3094117,rs3819294           | 1,1   | 0.067 | 0.918 | 1.000 |
| HLA-B*1510   | 0.0056 | rs11969139                    | 4     | 0.006 | 1.000 | 1.000 |
| HLA-B*1801   | 0.0389 | rs3129996,rs2523589,rs2844575 | 3,3,2 | 0.039 | 1.000 | 1.000 |
| HLA-B*2705   | 0.0056 | rs6919835                     | 3     | 0.011 | 0.497 | 0.994 |
| HLA-B*3501   | 0.0500 | rs2532934,rs3905495,rs2523685 | 1,1,3 | 0.050 | 1.000 | 1.000 |
| HLA-B*3503   | 0.0111 | rs1264375,rs1058026,rs2857605 | 2,2,4 | 0.011 | 1.000 | 1.000 |
| HLA-B*3701   | 0.0111 | rs2853931,rs7772218           | 1,3   | 0.011 | 1.000 | 1.000 |
| HLA-B*3801   | 0.0056 | rs2734331,rs3129944           | 3,3   | 0.011 | 0.497 | 1.000 |
| HLA-B*3905   | 0.0056 | rs3131382                     | 3     | 0.006 | 1.000 | 1.000 |
| HLA-B*3906   | 0.0111 | rs9468859,rs2844603           | 1,1   | 0.011 | 1.000 | 1.000 |
| HLA-B*4001   | 0.0389 | rs4711240,rs1265110           | 3,1   | 0.039 | 1.000 | 1.000 |
| HLA-B*4002   | 0.0167 | rs3819285                     | 2     | 0.017 | 1.000 | 1.000 |
| HLA-B*4101   | 0.0056 | rs2269708                     | 4     | 0.006 | 1.000 | 1.000 |
| HLA-B*4402   | 0.1222 | rs3130501,rs2769,rs2844533    | 2,4,4 | 0.128 | 0.950 | 1.000 |
| HLA-B*4403   | 0.0222 | rs12526186,rs7747738          | 2,1   | 0.022 | 1.000 | 1.000 |
| HLA-B*4404   | 0.0056 | rs2524180,rs7747738           | 4,1   | 0.011 | 0.497 | 1.000 |
| HLA-B*4405   | 0.0056 | rs2516683,rs2844685           | 2,4   | 0.011 | 0.497 | 1.000 |
| HLA-B*4901   | 0.0111 | rs2394985                     | 3     | 0.011 | 1.000 | 1.000 |
| HLA-B*5001   | 0.0167 | rs915653                      | 4     | 0.017 | 1.000 | 1.000 |
| HLA-B*5101   | 0.0278 | rs2516675,rs2844657,rs4947296 | 2,4,2 | 0.033 | 0.829 | 1.000 |
| HLA-B*5201   | 0.0167 | rs2517424,rs12526820          | 1,2   | 0.017 | 1.000 | 1.000 |
| HLA-B*5601   | 0.0111 | rs4122190                     | 1     | 0.011 | 1.000 | 1.000 |
| HLA-B*5701   | 0.0611 | rs2395029                     | 4     | 0.061 | 1.000 | 1.000 |
| HLA-B*5801   | 0.0056 | rs3130660,rs1063635           | 1,1   | 0.011 | 0.497 | 1.000 |
| HLA-C*0102   | 0.0167 | rs9380234                     | 2     | 0.017 | 1.000 | 1.000 |
| HLA-C*0202   | 0.0222 | rs1265100,rs4122189           | 3,2   | 0.022 | 1.000 | 1.000 |
| HLA-C*0303   | 0.0611 | rs1265100,rs7745906           | 1,1   | 0.056 | 0.904 | 1.000 |
| HLA-C*0304   | 0.0389 | rs4713391,rs7745906,rs3130434 | 2,1,2 | 0.039 | 1.000 | 1.000 |
| HLA-C*0401   | 0.0833 | rs9461684                     | 3     | 0.083 | 1.000 | 1.000 |
| HLA-C*0501   | 0.1167 | rs3130955,rs364415,rs4151665  | 2,1,2 | 0.117 | 1.000 | 1.000 |
| HLA-C*0602   | 0.1167 | rs887466,rs4379333            | 3,2   | 0.117 | 1.000 | 1.000 |
| HLA-C*0701   | 0.1778 | rs2524074,rs7382297           | 2,2   | 0.178 | 0.925 | 0.962 |
| HLA-C*0702   | 0.2056 | rs3132572,rs2001181           | 1,1   | 0.217 | 0.935 | 0.986 |
| HLA-C*0704   | 0.0278 | rs2524050,rs2256583           | 4,3   | 0.028 | 1.000 | 1.000 |
| HLA-C*0802   | 0.0167 | rs2524048,rs2442719           | 3,3   | 0.017 | 1.000 | 1.000 |
| HLA-C*1202   | 0.0111 | rs3869115,rs396960            | 2,4   | 0.011 | 1.000 | 1.000 |
| HLA-C*1203   | 0.0167 | rs3130457,rs2248902           | 1,4   | 0.017 | 1.000 | 1.000 |
| HLA-C*1402   | 0.0167 | rs2517439,rs2240061           | 1,2   | 0.017 | 1.000 | 1.000 |
| HLA-C*1502   | 0.0278 | rs3764808,rs4379333           | 3,2   | 0.028 | 1.000 | 1.000 |
| HLA-C*1601   | 0.0333 | rs7747738                     | 3     | 0.028 | 0.829 | 0.994 |
| HLA-C*1701   | 0.0056 | rs2269708                     | 4     | 0.006 | 1.000 | 1.000 |
| HLA-DQA*0101 | 0.1333 | rs6457614,rs1794265           | 1,3   | 0.133 | 1.000 | 1.000 |
| HLA-DQA*0102 | 0.2389 | rs14004,rs6457594             | 3,1   | 0.228 | 0.881 | 0.968 |
| HLA-DQA*0103 | 0.0556 | rs2273017,rs2157051           | 1,3   | 0.050 | 0.895 | 1.000 |
| HLA-DQA*0201 | 0.1333 | rs7745002,rs2858333,6p0315    | 2,3,3 | 0.133 | 0.906 | 0.952 |
| HLA-DQA*0301 | 0.2278 | rs3129883,rs7745002,rs3844313 | 2,2,3 | 0.228 | 1.000 | 1.000 |
| HLA-DQA*0401 | 0.0333 | rs7743506                     | 2     | 0.033 | 1.000 | 1.000 |
| HLA-DQA*0501 | 0.1778 | rs10485326,rs2040406          | 4,1   | 0.172 | 0.962 | 0.993 |
| HLA-DQB*0201 | 0.1556 | rs4988889                     | 3     | 0.150 | 0.958 | 0.993 |
| HLA-DQB*0301 | 0.1667 | rs7744001,rs2856691           | 1,2   | 0.167 | 1.000 | 1.000 |
| HLA-DQB*0302 | 0.1444 | rs7454108,rs2071876           | 2,2   | 0.144 | 1.000 | 1.000 |
| HLA-DQB*0303 | 0.0611 | rs3834857,rs2395533           | 2,4   | 0.061 | 1.000 | 1.000 |
| HLA-DQB*0305 | 0.0056 | rs9267532,rs707915            | 1,1   | 0.011 | 0.497 | 1.000 |
| HLA-DQB*0402 | 0.0333 | rs7743506                     | 2     | 0.033 | 1.000 | 1.000 |
| HLA-DQB*0501 | 0.0944 | rs6457614                     | 1     | 0.094 | 1.000 | 1.000 |
| HLA-DQB*0502 | 0.0222 | rs1548306,rs5875391           | 1,1   | 0.022 | 1.000 | 1.000 |
| HLA-DQB*0503 | 0.0389 | rs1794265                     | 3     | 0.039 | 1.000 | 1.000 |

Supplementary Table 3 - List of tags for HLA alleles

|              |        |                               |       |       |       |       |
|--------------|--------|-------------------------------|-------|-------|-------|-------|
| HLA-DQB*0601 | 0.0056 | rs2858880                     | 1     | 0.006 | 1.000 | 1.000 |
| HLA-DQB*0602 | 0.2000 | rs3135388                     | 3     | 0.206 | 0.966 | 0.993 |
| HLA-DQB*0603 | 0.0500 | rs2395150,rs3135461           | 4,3   | 0.050 | 1.000 | 1.000 |
| HLA-DQB*0604 | 0.0167 | rs10573,rs7766854             | 1,1   | 0.017 | 1.000 | 1.000 |
| HLA-DQB*0609 | 0.0056 | rs6901092                     | 1     | 0.006 | 1.000 | 1.000 |
| HLA-DRB*0101 | 0.0889 | rs4947332,rs6457614           | 3,2   | 0.089 | 1.000 | 1.000 |
| HLA-DRB*0301 | 0.0944 | rs2040410                     | 3     | 0.083 | 0.872 | 0.988 |
| HLA-DRB*0401 | 0.0889 | rs6910071,rs3817964,rs660895  | 2,1,2 | 0.117 | 0.739 | 1.000 |
| HLA-DRB*0402 | 0.0056 | rs3130071,rs416352            | 4,1   | 0.011 | 0.497 | 1.000 |
| HLA-DRB*0403 | 0.0167 | rs7454108,rs206765,rs399604   | 2,1,2 | 0.017 | 1.000 | 1.000 |
| HLA-DRB*0404 | 0.1056 | rs2736157,rs3115572,rs2395533 | 1,2,4 | 0.128 | 0.623 | 0.879 |
| HLA-DRB*0405 | 0.0056 | rs1057149                     | 2     | 0.011 | 0.497 | 0.994 |
| HLA-DRB*0407 | 0.0111 | rs7774197,rs417812            | 3,4   | 0.011 | 1.000 | 1.000 |
| HLA-DRB*0701 | 0.1000 | rs7745002,rs2647087,rs241398  | 2,3,2 | 0.117 | 0.739 | 0.937 |
| HLA-DRB*0801 | 0.0333 | rs7743506                     | 2     | 0.033 | 1.000 | 1.000 |
| HLA-DRB*1001 | 0.0056 | rs4148871,rs2071538           | 4,1   | 0.011 | 0.497 | 1.000 |
| HLA-DRB*1101 | 0.0500 | rs434841,rs1061172,rs5875439  | 3,3,3 | 0.050 | 1.000 | 1.000 |
| HLA-DRB*1103 | 0.0111 | rs4639334,rs412735,rs210180   | 4,1,4 | 0.011 | 1.000 | 1.000 |
| HLA-DRB*1104 | 0.0056 | rs4713607,rs12664430          | 1,1   | 0.011 | 0.497 | 1.000 |
| HLA-DRB*1201 | 0.0056 | rs6901541,rs6916742           | 2,1   | 0.011 | 0.497 | 1.000 |
| HLA-DRB*1301 | 0.0444 | rs2395173,rs2157051           | 3,3   | 0.050 | 0.884 | 1.000 |
| HLA-DRB*1302 | 0.0222 | rs4434496,rs6901541           | 4,4   | 0.022 | 1.000 | 1.000 |
| HLA-DRB*1303 | 0.0111 | rs424232,rs2050191            | 1,1   | 0.011 | 1.000 | 1.000 |
| HLA-DRB*1401 | 0.0333 | rs2763979,rs1794265           | 3,2   | 0.033 | 1.000 | 1.000 |
| HLA-DRB*1404 | 0.0056 | rs805262,rs1794265            | 3,2   | 0.011 | 0.497 | 1.000 |
| HLA-DRB*1501 | 0.2000 | rs3135388                     | 3     | 0.206 | 0.966 | 0.993 |
| HLA-DRB*1502 | 0.0056 | rs2858880                     | 1     | 0.006 | 1.000 | 1.000 |
| HLA-DRB*1601 | 0.0222 | rs7452076,rs6923504           | 4,3   | 0.022 | 1.000 | 1.000 |

## CHB

| HLA allele | frequency | tags                          | allele | frequency | rsquared | dprime |
|------------|-----------|-------------------------------|--------|-----------|----------|--------|
| HLA-A*0101 | 0.022     | rs1264709                     | 4      | 0.022     | 1.000    | 1.000  |
| HLA-A*0201 | 0.233     | rs892666,rs4959037,rs4678     | 2,1,2  | 0.244     | 0.941    | 1.000  |
| HLA-A*0203 | 0.033     | rs2844713,rs2269706           | 1,4    | 0.033     | 1.000    | 1.000  |
| HLA-A*0206 | 0.056     | rs6457109,rs9260988           | 3,1    | 0.056     | 1.000    | 1.000  |
| HLA-A*0301 | 0.022     | rs3130785                     | 3      | 0.022     | 1.000    | 1.000  |
| HLA-A*0302 | 0.022     | rs1736924,rs1557608           | 3,4    | 0.022     | 1.000    | 1.000  |
| HLA-A*1101 | 0.233     | rs2517754,rs7745235           | 2,1    | 0.233     | 1.000    | 1.000  |
| HLA-A*2402 | 0.156     | rs2734984,rs1611589           | 1,1    | 0.156     | 1.000    | 1.000  |
| HLA-A*2601 | 0.011     | rs3823339                     | 3      | 0.011     | 1.000    | 1.000  |
| HLA-A*3001 | 0.056     | rs3218822                     | 1      | 0.056     | 1.000    | 1.000  |
| HLA-A*3101 | 0.033     | rs3823318,rs1061235           | 2,1    | 0.033     | 1.000    | 1.000  |
| HLA-A*3201 | 0.022     | rs9468692                     | 2      | 0.022     | 1.000    | 1.000  |
| HLA-A*3303 | 0.078     | rs2524005,rs2855591           | 1,1    | 0.078     | 1.000    | 1.000  |
| HLA-A*6801 | 0.022     | rs2844800                     | 4      | 0.022     | 1.000    | 1.000  |
| HLA-B*0705 | 0.011     | rs2523480                     | 2      | 0.011     | 1.000    | 1.000  |
| HLA-B*0801 | 0.022     | rs4248151,rs3128982           | 2,2    | 0.022     | 1.000    | 1.000  |
| HLA-B*1301 | 0.033     | rs707913,rs2844586            | 3,1    | 0.033     | 1.000    | 1.000  |
| HLA-B*1302 | 0.056     | rs7761138,rs12212594          | 3,2    | 0.056     | 1.000    | 1.000  |
| HLA-B*1501 | 0.089     | rs2524178,rs3819294           | 3,1    | 0.100     | 0.878    | 1.000  |
| HLA-B*1502 | 0.011     | rs3909184,rs2844682           | 2,4    | 0.011     | 1.000    | 1.000  |
| HLA-B*1511 | 0.011     | rs2074491                     | 4      | 0.011     | 1.000    | 1.000  |
| HLA-B*1518 | 0.033     | rs4084091,rs3819294           | 1,1    | 0.033     | 1.000    | 1.000  |
| HLA-B*3501 | 0.022     | rs1264307,rs3128982           | 1,2    | 0.022     | 1.000    | 1.000  |
| HLA-B*3503 | 0.022     | rs3130785                     | 3      | 0.022     | 1.000    | 1.000  |
| HLA-B*3701 | 0.011     | rs4947332                     | 3      | 0.011     | 1.000    | 1.000  |
| HLA-B*3801 | 0.011     | rs9295863                     | 3      | 0.011     | 1.000    | 1.000  |
| HLA-B*3802 | 0.033     | rs2844725,rs3828875           | 1,4    | 0.033     | 1.000    | 1.000  |
| HLA-B*3901 | 0.011     | rs1811197,rs2844575           | 4,2    | 0.011     | 1.000    | 1.000  |
| HLA-B*4001 | 0.122     | rs2844580,rs2523694           | 3,2    | 0.111     | 0.898    | 1.000  |
| HLA-B*4002 | 0.011     | rs6930444,rs3130655           | 3,4    | 0.011     | 1.000    | 1.000  |
| HLA-B*4006 | 0.044     | rs3819299,rs8283              | 2,4    | 0.044     | 1.000    | 1.000  |
| HLA-B*4601 | 0.111     | rs2243868,rs2524227,rs2857595 | 3,1,1  | 0.100     | 0.889    | 1.000  |

Supplementary Table 3 - List of tags for HLA alleles

|              |       |                               |       |       |       |       |
|--------------|-------|-------------------------------|-------|-------|-------|-------|
| HLA-B*4801   | 0.044 | rs4959069                     | 2     | 0.044 | 1.000 | 1.000 |
| HLA-B*5101   | 0.078 | rs3905495,rs7450800,rs2471980 | 1,2,3 | 0.067 | 0.847 | 1.000 |
| HLA-B*5201   | 0.044 | rs1062470,rs2844586           | 3,1   | 0.044 | 1.000 | 1.000 |
| HLA-B*5401   | 0.056 | rs3130786,rs3819284           | 1,1   | 0.056 | 1.000 | 1.000 |
| HLA-B*5601   | 0.011 | rs3130977,rs1063632           | 3,4   | 0.011 | 1.000 | 1.000 |
| HLA-B*5701   | 0.011 | rs3093726                     | 4     | 0.011 | 1.000 | 1.000 |
| HLA-B*5801   | 0.044 | rs3134792,rs4713518           | 3,1   | 0.044 | 1.000 | 1.000 |
| HLA-B*5901   | 0.011 | rs3094188,rs1063632           | 2,4   | 0.011 | 1.000 | 1.000 |
| HLA-B*6701   | 0.022 | rs2239523,rs4947248           | 3,2   | 0.022 | 1.000 | 1.000 |
| HLA-B*8101   | 0.011 | rs2507997,rs3134954           | 2,2   | 0.011 | 1.000 | 1.000 |
| HLA-C*0102   | 0.178 | rs3834326,rs4122190           | 1,1   | 0.178 | 1.000 | 1.000 |
| HLA-C*0302   | 0.044 | rs1265155,rs4713438           | 3,4   | 0.044 | 1.000 | 1.000 |
| HLA-C*0303   | 0.078 | rs6457350,rs2156875           | 2,4   | 0.078 | 1.000 | 1.000 |
| HLA-C*0304   | 0.044 | rs6457350,rs4947248           | 2,2   | 0.044 | 1.000 | 1.000 |
| HLA-C*0401   | 0.044 | rs7451258,rs12662501          | 2,1   | 0.044 | 1.000 | 1.000 |
| HLA-C*0602   | 0.078 | rs3130457                     | 1     | 0.078 | 1.000 | 1.000 |
| HLA-C*0702   | 0.200 | rs2001181                     | 1     | 0.200 | 1.000 | 1.000 |
| HLA-C*0704   | 0.011 | rs2395031                     | 3     | 0.011 | 1.000 | 1.000 |
| HLA-C*0801   | 0.144 | rs2524100                     | 1     | 0.144 | 1.000 | 1.000 |
| HLA-C*1202   | 0.044 | rs3094663,rs2073723           | 2,4   | 0.044 | 1.000 | 1.000 |
| HLA-C*1203   | 0.033 | rs6929434                     | 4     | 0.033 | 1.000 | 1.000 |
| HLA-C*1402   | 0.044 | rs3095301,rs2073716           | 4,2   | 0.044 | 1.000 | 1.000 |
| HLA-C*1502   | 0.056 | rs7451258                     | 2     | 0.056 | 1.000 | 1.000 |
| HLA-DQA*0101 | 0.100 | rs8365,rs482044,rs532098      | 2,2,2 | 0.089 | 0.878 | 1.000 |
| HLA-DQA*0102 | 0.122 | rs5875382,rs1063355           | 3,1   | 0.122 | 0.629 | 0.793 |
| HLA-DQA*0103 | 0.144 | rs7744001,rs1063355,rs2187686 | 1,1,2 | 0.133 | 0.911 | 1.000 |
| HLA-DQA*0201 | 0.067 | rs7763805,rs3844313           | 2,1   | 0.056 | 0.824 | 1.000 |
| HLA-DQA*0301 | 0.322 | rs2395533,rs6903433           | 4,3   | 0.300 | 0.901 | 1.000 |
| HLA-DQA*0401 | 0.022 | rs1694112,rs4711312           | 1,2   | 0.022 | 1.000 | 1.000 |
| HLA-DQA*0501 | 0.122 | rs4639334,rs6908943           | 2,3   | 0.122 | 1.000 | 1.000 |
| HLA-DQA*0601 | 0.078 | rs1061172,rs3129718           | 3,1   | 0.078 | 1.000 | 1.000 |
| HLA-DQB*0201 | 0.111 | rs4988889                     | 3     | 0.111 | 1.000 | 1.000 |
| HLA-DQB*0301 | 0.167 | rs6928482,rs1056315           | 3,1   | 0.167 | 1.000 | 1.000 |
| HLA-DQB*0302 | 0.067 | rs6906021,rs9275184           | 4,3   | 0.067 | 1.000 | 1.000 |
| HLA-DQB*0303 | 0.189 | rs2395533,rs2856683           | 4,4   | 0.189 | 1.000 | 1.000 |
| HLA-DQB*0401 | 0.067 | rs2077580,rs2395533,rs2300825 | 2,4,1 | 0.067 | 1.000 | 1.000 |
| HLA-DQB*0402 | 0.033 | rs2076528,rs1694112,rs6937034 | 1,1,1 | 0.033 | 1.000 | 1.000 |
| HLA-DQB*0501 | 0.011 | rs4947332                     | 3     | 0.011 | 1.000 | 1.000 |
| HLA-DQB*0502 | 0.078 | rs7744001,rs6906021,rs2300825 | 3,2,3 | 0.078 | 1.000 | 1.000 |
| HLA-DQB*0503 | 0.044 | rs1794265,rs241446            | 2,2   | 0.044 | 1.000 | 1.000 |
| HLA-DQB*0601 | 0.144 | rs7744001,rs6928482           | 1,1   | 0.144 | 1.000 | 1.000 |
| HLA-DQB*0602 | 0.044 | rs3134975,rs2621426           | 4,2   | 0.044 | 1.000 | 1.000 |
| HLA-DQB*0603 | 0.011 | rs3806155                     | 4     | 0.011 | 1.000 | 1.000 |
| HLA-DQB*0604 | 0.033 | rs11758998                    | 2     | 0.033 | 1.000 | 1.000 |
| HLA-DRB*0301 | 0.067 | rs5000803,rs7769979,rs3129299 | 1,4,3 | 0.078 | 0.847 | 1.000 |
| HLA-DRB*0401 | 0.022 | rs2239705,rs2395175           | 4,4   | 0.022 | 1.000 | 1.000 |
| HLA-DRB*0403 | 0.033 | rs2075800,rs2395175           | 4,4   | 0.033 | 1.000 | 1.000 |
| HLA-DRB*0404 | 0.011 | rs9404991                     | 1     | 0.011 | 1.000 | 1.000 |
| HLA-DRB*0405 | 0.078 | rs3129878,rs2516049           | 3,2   | 0.078 | 1.000 | 1.000 |
| HLA-DRB*0410 | 0.011 | rs4713521,rs3130267           | 4,2   | 0.011 | 1.000 | 1.000 |
| HLA-DRB*0701 | 0.067 | rs3129859,rs2395177           | 3,2   | 0.056 | 0.824 | 1.000 |
| HLA-DRB*0801 | 0.022 | rs4713479,rs2763982           | 1,3   | 0.022 | 1.000 | 1.000 |
| HLA-DRB*0802 | 0.022 | rs11757862,rs1044506          | 1,2   | 0.022 | 1.000 | 1.000 |
| HLA-DRB*0803 | 0.089 | rs3129859,rs1041885,rs154984  | 2,4,2 | 0.100 | 0.878 | 1.000 |
| HLA-DRB*0901 | 0.178 | rs2395185,rs2516049           | 1,4   | 0.178 | 1.000 | 1.000 |
| HLA-DRB*1001 | 0.011 | rs4947332                     | 3     | 0.011 | 1.000 | 1.000 |
| HLA-DRB*1101 | 0.033 | rs4639334,rs1383261           | 4,3   | 0.033 | 1.000 | 1.000 |
| HLA-DRB*1201 | 0.056 | rs2105903,rs2856718,rs206777  | 4,1,2 | 0.056 | 1.000 | 1.000 |
| HLA-DRB*1202 | 0.078 | rs6916742,rs646984,rs4947342  | 1,3,2 | 0.078 | 1.000 | 1.000 |
| HLA-DRB*1301 | 0.011 | rs3873444                     | 2     | 0.011 | 1.000 | 1.000 |
| HLA-DRB*1302 | 0.033 | rs11758998                    | 2     | 0.033 | 1.000 | 1.000 |
| HLA-DRB*1401 | 0.044 | rs1799964,rs3129961,rs9469185 | 1,3,1 | 0.044 | 1.000 | 1.000 |
| HLA-DRB*1407 | 0.011 | rs4248157                     | 2     | 0.011 | 1.000 | 1.000 |
| HLA-DRB*1444 | 0.011 | rs429853,rs3129949            | 3,4   | 0.011 | 1.000 | 1.000 |
| HLA-DRB*1501 | 0.067 | rs7773756,rs6903608,rs620202  | 4,3,2 | 0.067 | 1.000 | 1.000 |

Supplementary Table 3 - List of tags for HLA alleles

|              |       |                     |     |       |       |       |
|--------------|-------|---------------------|-----|-------|-------|-------|
| HLA-DRB*1502 | 0.022 | rs2858880           | 1   | 0.022 | 1.000 | 1.000 |
| HLA-DRB*1602 | 0.022 | rs7769073,rs2227139 | 4,1 | 0.022 | 1.000 | 1.000 |

## JPT

| HLA allele   | frequency | tags                          | allele | frequency | rsquared | dprime |
|--------------|-----------|-------------------------------|--------|-----------|----------|--------|
| HLA-A*0201   | 0.125     | rs9348834,rs6457110           | 4,1    | 0.125     | 1.000    | 1.000  |
| HLA-A*0206   | 0.091     | rs892666,rs2517699            | 4,2    | 0.091     | 1.000    | 1.000  |
| HLA-A*0301   | 0.011     | rs2524172                     | 3      | 0.011     | 1.000    | 1.000  |
| HLA-A*1101   | 0.068     | rs2893998                     | 2      | 0.068     | 1.000    | 1.000  |
| HLA-A*2402   | 0.341     | rs1611589,rs2275854           | 1,2    | 0.341     | 1.000    | 1.000  |
| HLA-A*2404   | 0.011     | rs2523960,rs2240619           | 3,3    | 0.011     | 1.000    | 1.000  |
| HLA-A*2601   | 0.068     | rs3823339,rs1045251,rs3132571 | 2,4,1  | 0.080     | 0.847    | 1.000  |
| HLA-A*2603   | 0.046     | rs2745409,rs2301751           | 2,4    | 0.057     | 0.790    | 1.000  |
| HLA-A*3001   | 0.011     | rs3218822                     | 1      | 0.011     | 1.000    | 1.000  |
| HLA-A*3101   | 0.114     | rs1061235,rs1150739           | 1,1    | 0.114     | 1.000    | 1.000  |
| HLA-A*3303   | 0.114     | rs2524005,rs1150739           | 1,3    | 0.114     | 1.000    | 1.000  |
| HLA-B*0702   | 0.057     | rs2523480                     | 2      | 0.057     | 1.000    | 1.000  |
| HLA-B*1301   | 0.011     | rs1264513,rs2844573           | 1,3    | 0.011     | 1.000    | 1.000  |
| HLA-B*1302   | 0.011     | rs12191164                    | 3      | 0.011     | 1.000    | 1.000  |
| HLA-B*1501   | 0.057     | rs12208824,rs6928547          | 4,2    | 0.057     | 1.000    | 1.000  |
| HLA-B*1507   | 0.023     | rs2532934,rs3819294           | 3,1    | 0.023     | 1.000    | 1.000  |
| HLA-B*1518   | 0.011     | rs1150758                     | 2      | 0.011     | 1.000    | 1.000  |
| HLA-B*3501   | 0.057     | rs2596501,rs2844521           | 3,4    | 0.057     | 1.000    | 1.000  |
| HLA-B*3901   | 0.046     | rs1811197,rs3134931           | 4,1    | 0.046     | 1.000    | 1.000  |
| HLA-B*4001   | 0.057     | rs7381331                     | 3      | 0.057     | 1.000    | 1.000  |
| HLA-B*4002   | 0.148     | rs3130573,rs3819299           | 4,2    | 0.148     | 1.000    | 1.000  |
| HLA-B*4006   | 0.046     | rs986475,rs2075788            | 2,3    | 0.046     | 1.000    | 1.000  |
| HLA-B*4402   | 0.011     | rs2517512                     | 2      | 0.011     | 1.000    | 1.000  |
| HLA-B*4403   | 0.080     | rs2844523                     | 2      | 0.080     | 1.000    | 1.000  |
| HLA-B*4601   | 0.068     | rs3873334,rs3130536,rs2251396 | 4,3,1  | 0.068     | 1.000    | 1.000  |
| HLA-B*4801   | 0.011     | rs4959069                     | 2      | 0.011     | 1.000    | 1.000  |
| HLA-B*5101   | 0.080     | rs6933050,rs2596560           | 3,4    | 0.080     | 1.000    | 1.000  |
| HLA-B*5201   | 0.091     | rs2523608,rs2596560           | 4,2    | 0.091     | 1.000    | 1.000  |
| HLA-B*5401   | 0.057     | rs1634789,rs1063632           | 1,4    | 0.057     | 1.000    | 1.000  |
| HLA-B*5601   | 0.011     | rs2429657,rs2853926           | 2,3    | 0.011     | 1.000    | 1.000  |
| HLA-B*5801   | 0.011     | rs3095318                     | 1      | 0.011     | 1.000    | 1.000  |
| HLA-B*5901   | 0.023     | rs3819284,rs2076536           | 1,3    | 0.023     | 1.000    | 1.000  |
| HLA-B*6701   | 0.034     | rs3828875,rs761188            | 4,4    | 0.034     | 1.000    | 1.000  |
| HLA-C*0102   | 0.148     | rs1264459,rs2535294,rs2524227 | 1,4,1  | 0.148     | 1.000    | 1.000  |
| HLA-C*0103   | 0.011     | rs660550,rs2267644            | 3,1    | 0.011     | 1.000    | 1.000  |
| HLA-C*0302   | 0.011     | rs7744914                     | 3      | 0.011     | 1.000    | 1.000  |
| HLA-C*0303   | 0.148     | rs4084093,rs2853950,rs6457388 | 4,3,4  | 0.148     | 1.000    | 1.000  |
| HLA-C*0304   | 0.125     | rs2853950,rs3873386           | 1,2    | 0.136     | 0.905    | 1.000  |
| HLA-C*0401   | 0.023     | rs1632856                     | 2      | 0.023     | 1.000    | 1.000  |
| HLA-C*0501   | 0.011     | rs2517512                     | 2      | 0.011     | 1.000    | 1.000  |
| HLA-C*0602   | 0.011     | rs3134942                     | 3      | 0.011     | 1.000    | 1.000  |
| HLA-C*0702   | 0.182     | rs2001181                     | 1      | 0.182     | 1.000    | 1.000  |
| HLA-C*0704   | 0.011     | rs3093542                     | 2      | 0.011     | 1.000    | 1.000  |
| HLA-C*0801   | 0.057     | rs2524160,rs2524227           | 4,3    | 0.057     | 1.000    | 1.000  |
| HLA-C*1202   | 0.091     | rs6923313,rs3873386           | 3,2    | 0.091     | 1.000    | 1.000  |
| HLA-C*1402   | 0.080     | rs6457300,rs130074            | 4,1    | 0.080     | 1.000    | 1.000  |
| HLA-C*1403   | 0.080     | rs2507997,rs2523653           | 2,4    | 0.080     | 1.000    | 1.000  |
| HLA-C*1502   | 0.011     | rs2240066                     | 1      | 0.011     | 1.000    | 1.000  |
| HLA-DQA*0101 | 0.114     | rs6927022,rs2647050,rs6932517 | 4,1,2  | 0.091     | 0.780    | 1.000  |
| HLA-DQA*0102 | 0.193     | rs8180664,rs3134975           | 2,4    | 0.193     | 1.000    | 1.000  |
| HLA-DQA*0103 | 0.182     | rs7744001,rs1063355           | 1,1    | 0.171     | 0.925    | 1.000  |
| HLA-DQA*0201 | 0.011     | rs12191164                    | 3      | 0.011     | 1.000    | 1.000  |
| HLA-DQA*0301 | 0.352     | rs5875382,rs2856716,rs6457617 | 3,1,1  | 0.352     | 1.000    | 1.000  |
| HLA-DQA*0401 | 0.057     | rs1061172,rs1056315           | 3,2    | 0.057     | 1.000    | 1.000  |
| HLA-DQA*0501 | 0.080     | rs7769073,rs2097432           | 1,4    | 0.080     | 1.000    | 1.000  |
| HLA-DQA*0601 | 0.011     | rs2736182,rs2071293           | 4,1    | 0.011     | 1.000    | 1.000  |
| HLA-DQB*0201 | 0.011     | rs12191164                    | 3      | 0.011     | 1.000    | 1.000  |
| HLA-DQB*0301 | 0.102     | rs1056315                     | 2      | 0.102     | 1.000    | 1.000  |

Supplementary Table 3 - List of tags for HLA alleles

|              |       |                               |       |       |       |       |
|--------------|-------|-------------------------------|-------|-------|-------|-------|
| HLA-DQB*0302 | 0.091 | rs9275184,rs393906            | 3,1   | 0.091 | 1.000 | 1.000 |
| HLA-DQB*0303 | 0.182 | rs2395533,rs2300825,rs3998159 | 4,3,4 | 0.193 | 0.928 | 1.000 |
| HLA-DQB*0401 | 0.091 | rs2395533,rs2300825           | 4,1   | 0.091 | 1.000 | 1.000 |
| HLA-DQB*0402 | 0.011 | rs926594,rs7743506            | 2,1   | 0.011 | 1.000 | 1.000 |
| HLA-DQB*0501 | 0.057 | rs6457614                     | 1     | 0.057 | 1.000 | 1.000 |
| HLA-DQB*0502 | 0.011 | rs6918223,rs1367731           | 1,4   | 0.011 | 1.000 | 1.000 |
| HLA-DQB*0503 | 0.046 | rs5000803,rs2856717           | 1,4   | 0.046 | 1.000 | 1.000 |
| HLA-DQB*0601 | 0.171 | rs7744001,rs1063355           | 1,1   | 0.171 | 1.000 | 1.000 |
| HLA-DQB*0602 | 0.102 | rs5875382,rs2647012           | 3,4   | 0.102 | 1.000 | 1.000 |
| HLA-DQB*0603 | 0.011 | rs2857597                     | 1     | 0.011 | 1.000 | 1.000 |
| HLA-DQB*0604 | 0.080 | rs3892710,rs6457713           | 1,3   | 0.080 | 1.000 | 1.000 |
| HLA-DQB*0605 | 0.011 | rs3129267                     | 2     | 0.011 | 1.000 | 1.000 |
| HLA-DRB*0101 | 0.046 | rs13209234,rs9276814          | 4,3   | 0.046 | 1.000 | 1.000 |
| HLA-DRB*0401 | 0.011 | rs1150758                     | 2     | 0.011 | 1.000 | 1.000 |
| HLA-DRB*0403 | 0.023 | rs169494,rs3763349            | 4,4   | 0.023 | 1.000 | 1.000 |
| HLA-DRB*0405 | 0.102 | rs411326,rs2395185,rs4599680  | 2,1,1 | 0.102 | 0.768 | 0.876 |
| HLA-DRB*0406 | 0.023 | rs2395175,rs6936863           | 4,3   | 0.023 | 1.000 | 1.000 |
| HLA-DRB*0701 | 0.011 | rs3134942                     | 3     | 0.011 | 1.000 | 1.000 |
| HLA-DRB*0801 | 0.034 | rs2071469,rs2116259,rs3077    | 4,4,1 | 0.034 | 1.000 | 1.000 |
| HLA-DRB*0802 | 0.057 | rs3129888,rs2239800           | 3,1   | 0.057 | 1.000 | 1.000 |
| HLA-DRB*0803 | 0.034 | rs3834856,rs412735            | 3,1   | 0.034 | 1.000 | 1.000 |
| HLA-DRB*0812 | 0.011 | rs2856683,rs3763350           | 3,1   | 0.011 | 1.000 | 1.000 |
| HLA-DRB*0901 | 0.171 | rs2187818,rs5000803,rs7756741 | 1,2,1 | 0.193 | 0.858 | 1.000 |
| HLA-DRB*1101 | 0.023 | rs4424079,rs1799911           | 1,1   | 0.023 | 1.000 | 1.000 |
| HLA-DRB*1201 | 0.046 | rs4569,rs2294881,rs1548306    | 1,3,1 | 0.046 | 1.000 | 1.000 |
| HLA-DRB*1301 | 0.011 | rs544167                      | 4     | 0.011 | 1.000 | 1.000 |
| HLA-DRB*1302 | 0.091 | rs6936204,rs2157339           | 3,1   | 0.091 | 1.000 | 1.000 |
| HLA-DRB*1401 | 0.034 | rs4151657,rs5000803           | 3,1   | 0.034 | 1.000 | 1.000 |
| HLA-DRB*1403 | 0.023 | rs3819703                     | 4     | 0.023 | 1.000 | 1.000 |
| HLA-DRB*1405 | 0.023 | rs3093953,rs440454            | 1,1   | 0.023 | 1.000 | 1.000 |
| HLA-DRB*1501 | 0.102 | rs7773756,rs6919855,rs6901830 | 4,3,3 | 0.102 | 1.000 | 1.000 |
| HLA-DRB*1502 | 0.102 | rs3135365,rs7382794           | 3,1   | 0.102 | 1.000 | 1.000 |
