# Supplementary material
Source: PubMed Central journal article supplement (PMC2670196)
Supplement: NIHMS4414-supplement-Table_4.pdf [file NIHMS4414-supplement-Table_4.pdf]

Supplementary Table 4 - Cross-panel performance of HLA tags

This table lists how well the tags picked to capture a given HLA allele in each of the 4 panels capture the same HLA allele in the YRI panel (etc.). It is possible that an equivalent tag/test for any given HLA allele performs better in a given panel (e.g. YRI) simply due to LD differences.

## YRI

| HLA allele           | frequency | tags from CEU                 | allele | frequency | rsquared | dprime |
|----------------------|-----------|-------------------------------|--------|-----------|----------|--------|
| HLA-A*0201           | 0.042     | rs2844821,rs762324            | 3,2    | 0.050     | 0.826    | 1.000  |
| HLA-A*2601           | 0.025     | rs2301751,rs4678              | 4,2    | 0.025     | 0.433    | 0.658  |
| HLA-A*3201           | 0.008     | rs1611578,rs3130244           | 3,2    | 0.017     | 0.496    | 1.000  |
| HLA-A*6801           | 0.017     | rs1610714,rs2571375           | 3,3    | 0.017     | 1.000    | 1.000  |
| HLA-B*0801           | 0.008     | rs6457374,rs2844535           | 3,2    | 0.008     | 1.000    | 1.000  |
| HLA-B*4901           | 0.050     | rs2394985                     | 3      | 0.042     | 0.826    | 0.991  |
| HLA-B*5601           | 0.008     | rs4122190                     | 1      | 0.008     | 1.000    | 1.000  |
| HLA-C*0102           | 0.008     | rs9380234                     | 2      | 0.008     | 1.000    | 1.000  |
| HLA-C*0602           | 0.008     | rs887466,rs4379333            | 3,2    | 0.017     | 0.496    | 1.000  |
| HLA-C*0701           | 0.133     | rs2524074,rs7382297           | 2,2    | 0.125     | 0.929    | 1.000  |
| HLA-C*0802           | 0.050     | rs2524048,rs2442719           | 3,3    | 0.083     | 0.234    | 0.636  |
| HLA-C*1203           | 0.008     | rs3130457,rs2248902           | 1,4    | 0.008     | 1.000    | 1.000  |
| HLA-C*1601           | 0.167     | rs7747738                     | 3      | 0.175     | 0.832    | 0.930  |
| HLA-DQA*0101         | 0.100     | rs6457614,rs1794265           | 1,3    | 0.133     | 0.471    | 0.778  |
| HLA-DQA*0102         | 0.242     | rs14004,rs6457594             | 3,1    | 0.250     | 0.279    | 0.540  |
| HLA-DQA*0103         | 0.083     | rs2273017,rs2157051           | 1,3    | 0.058     | 0.323    | 0.688  |
| HLA-DQA*0301         | 0.058     | rs3129883,rs7745002,rs3844313 | 2,2,3  | 0.142     | 0.375    | 1.000  |
| HLA-DQB*0201         | 0.275     | rs4988889                     | 3      | 0.275     | 1.000    | 1.000  |
| HLA-DQB*0301         | 0.175     | rs7744001,rs2856691           | 1,2    | 0.217     | 0.767    | 1.000  |
| HLA-DQB*0501         | 0.125     | rs6457614                     | 1      | 0.125     | 1.000    | 1.000  |
| HLA-DQB*0503         | 0.025     | rs1794265                     | 3      | 0.008     | 0.328    | 0.983  |
| HLA-DQB*0603         | 0.058     | rs2395150,rs3135461           | 4,3    | 0.058     | 0.485    | 0.697  |
| HLA-DRB*0301         | 0.092     | rs2040410                     | 3      | 0.083     | 0.548    | 0.773  |
| HLA-DRB*0701         | 0.125     | rs7745002,rs2647087,rs241398  | 2,3,2  | 0.125     | 0.295    | 0.543  |
| HLA-DRB*1301         | 0.083     | rs2395173,rs2157051           | 3,3    | 0.075     | 0.361    | 0.636  |
| HLA-DRB*1302         | 0.058     | rs4434496,rs6901541           | 4,4    | 0.092     | 0.614    | 1.000  |
| <b>tags from CHB</b> |           |                               |        |           |          |        |
| HLA-A*2601           | 0.025     | rs3823339                     | 3      | 0.025     | 1.000    | 1.000  |
| HLA-A*3303           | 0.108     | rs2524005,rs2855591           | 1,1    | 0.133     | 0.656    | 0.911  |
| HLA-A*6801           | 0.017     | rs2844800                     | 4      | 0.025     | 0.661    | 0.992  |
| HLA-C*0302           | 0.042     | rs1265155,rs4713438           | 3,4    | 0.150     | 0.246    | 1.000  |
| HLA-C*0702           | 0.058     | rs2001181                     | 1      | 0.058     | 1.000    | 1.000  |
| HLA-C*1203           | 0.008     | rs6929434                     | 4      | 0.008     | 1.000    | 1.000  |
| HLA-DQA*0102         | 0.242     | rs5875382,rs1063355           | 3,1    | 0.175     | 0.509    | 0.874  |
| HLA-DQA*0201         | 0.150     | rs7763805,rs3844313           | 2,1    | 0.075     | 0.459    | 1.000  |
| HLA-DQA*0301         | 0.058     | rs2395533,rs6903433           | 4,3    | 0.017     | 0.274    | 1.000  |
| HLA-DQA*0501         | 0.233     | rs4639334,rs6908943           | 2,3    | 0.417     | 0.328    | 0.668  |
| HLA-DQB*0201         | 0.275     | rs4988889                     | 3      | 0.275     | 1.000    | 1.000  |
| HLA-DQB*0301         | 0.175     | rs6928482,rs1056315           | 3,1    | 0.175     | 1.000    | 1.000  |
| HLA-DQB*0302         | 0.017     | rs6906021,rs9275184           | 4,3    | 0.017     | 1.000    | 1.000  |
| HLA-DQB*0502         | 0.058     | rs7744001,rs6906021,rs2300825 | 3,2,3  | 0.017     | 0.274    | 1.000  |
| HLA-DQB*0503         | 0.025     | rs1794265,rs241446            | 2,2    | 0.008     | 0.328    | 1.000  |
| HLA-DQB*0602         | 0.100     | rs3134975,rs2621426           | 4,2    | 0.183     | 0.399    | 0.898  |
| HLA-DRB*0701         | 0.125     | rs3129859,rs2395177           | 3,2    | 0.075     | 0.433    | 0.873  |
| HLA-DRB*1302         | 0.058     | rs11758998                    | 2      | 0.058     | 0.720    | 0.848  |
| <b>tags from JPT</b> |           |                               |        |           |          |        |
| HLA-A*2601           | 0.025     | rs3823339,rs1045251,rs3132571 | 2,4,1  | 0.008     | 0.328    | 1.000  |
| HLA-B*0702           | 0.075     | rs2523480                     | 2      | 0.058     | 0.764    | 0.982  |
| HLA-B*5201           | 0.083     | rs2523608,rs2596560           | 4,2    | 0.275     | 0.240    | 1.000  |
| HLA-C*0702           | 0.058     | rs2001181                     | 1      | 0.058     | 1.000    | 1.000  |
| HLA-DQA*0101         | 0.100     | rs6927022,rs2647050,rs6932517 | 4,1,2  | 0.183     | 0.238    | 0.694  |

Supplementary Table 4 - Cross-panel performance of HLA tags

|              |       |                     |     |       |       |       |
|--------------|-------|---------------------|-----|-------|-------|-------|
| HLA-DQA*0102 | 0.242 | rs8180664,rs3134975 | 2,4 | 0.217 | 0.306 | 0.594 |
| HLA-DQA*0401 | 0.133 | rs1061172,rs1056315 | 3,2 | 0.108 | 0.790 | 1.000 |
| HLA-DQB*0301 | 0.175 | rs1056315           | 2   | 0.267 | 0.583 | 0.889 |
| HLA-DQB*0501 | 0.125 | rs6457614           | 1   | 0.125 | 1.000 | 1.000 |
| HLA-DQB*0602 | 0.100 | rs5875382,rs2647012 | 3,4 | 0.200 | 0.444 | 1.000 |
| HLA-DRB*1302 | 0.058 | rs6936204,rs2157339 | 3,1 | 0.058 | 0.720 | 0.848 |

## CEU

| HLA allele   | frequency | tags from YRI                 | allele | frequency | rsquared | dprime |
|--------------|-----------|-------------------------------|--------|-----------|----------|--------|
| HLA-A*0201   | 0.328     | rs4713240,rs3132682           | 3,2    | 0.272     | 0.592    | 0.879  |
| HLA-A*0301   | 0.094     | rs2524024                     | 1      | 0.106     | 0.884    | 0.988  |
| HLA-A*2601   | 0.022     | rs3823339                     | 3      | 0.061     | 0.349    | 0.960  |
| HLA-A*2902   | 0.017     | rs7741100,rs2523807           | 3,2    | 0.022     | 0.746    | 1.000  |
| HLA-A*6801   | 0.033     | rs2735068,rs2524198           | 2,2    | 0.028     | 0.521    | 0.793  |
| HLA-B*0702   | 0.183     | rs2523618                     | 4      | 0.222     | 0.786    | 0.952  |
| HLA-B*0801   | 0.139     | rs1059612                     | 2      | 0.144     | 0.561    | 0.761  |
| HLA-B*3501   | 0.050     | rs2249876,rs1058026,rs2844498 | 4,2,2  | 0.067     | 0.428    | 0.762  |
| HLA-B*5601   | 0.011     | rs4122190                     | 1      | 0.011     | 1.000    | 1.000  |
| HLA-C*0102   | 0.017     | rs4122190                     | 1      | 0.011     | 0.663    | 0.994  |
| HLA-C*0202   | 0.022     | rs6923313,rs2243868           | 3,3    | 0.067     | 0.318    | 1.000  |
| HLA-C*0401   | 0.083     | rs4386816                     | 4      | 0.122     | 0.653    | 0.958  |
| HLA-C*0701   | 0.178     | rs3132499,rs2524074           | 1,2    | 0.178     | 0.925    | 0.962  |
| HLA-C*1203   | 0.017     | rs6929434                     | 4      | 0.022     | 0.746    | 0.994  |
| HLA-C*1601   | 0.033     | rs2844603,rs2844586           | 3,1    | 0.039     | 0.582    | 0.827  |
| HLA-C*1701   | 0.006     | rs2524069,rs5875311,rs3096702 | 1,3,2  | 0.006     | 1.000    | 1.000  |
| HLA-DQA*0101 | 0.133     | rs3134605,rs2858330,rs1612904 | 1,1,1  | 0.128     | 0.952    | 1.000  |
| HLA-DQA*0102 | 0.239     | rs204996,rs6457594,rs1063355  | 3,1,1  | 0.261     | 0.497    | 0.748  |
| HLA-DQA*0103 | 0.056     | rs3135338,rs2858867,rs5875382 | 1,4,1  | 0.156     | 0.248    | 0.882  |
| HLA-DQA*0201 | 0.133     | rs3844313,rs2647012           | 1,2    | 0.067     | 0.464    | 1.000  |
| HLA-DQA*0301 | 0.228     | rs5875382,rs6457617           | 3,1    | 0.311     | 0.653    | 1.000  |
| HLA-DQA*0401 | 0.033     | rs4639334,rs1061172           | 2,3    | 0.033     | 1.000    | 1.000  |
| HLA-DQB*0201 | 0.156     | rs4988889                     | 3      | 0.150     | 0.958    | 0.993  |
| HLA-DQB*0301 | 0.167     | rs6928482,rs1056315           | 3,1    | 0.161     | 0.808    | 0.917  |
| HLA-DQB*0302 | 0.144     | rs7454108                     | 4      | 0.150     | 0.957    | 0.994  |
| HLA-DQB*0402 | 0.033     | rs2213586,rs4947342           | 4,4    | 0.039     | 0.852    | 1.000  |
| HLA-DQB*0501 | 0.094     | rs6457614                     | 1      | 0.094     | 1.000    | 1.000  |
| HLA-DQB*0503 | 0.039     | rs1612904,rs2856717           | 1,4    | 0.039     | 1.000    | 1.000  |
| HLA-DQB*0602 | 0.200     | rs5875382,rs3134975           | 3,4    | 0.206     | 0.966    | 1.000  |
| HLA-DQB*0604 | 0.017     | rs3129848,rs2858867,rs1978029 | 4,2,4  | 0.078     | 0.201    | 1.000  |
| HLA-DRB*1301 | 0.044     | rs3134942,rs3763308,rs7451962 | 3,4,2  | 0.022     | 0.266    | 0.738  |
| HLA-DRB*1401 | 0.033     | rs1612904,rs2856717           | 1,4    | 0.039     | 0.852    | 1.000  |

### tags from CHB

|            |       |                               |       |       |       |       |
|------------|-------|-------------------------------|-------|-------|-------|-------|
| HLA-A*0101 | 0.189 | rs1264709                     | 4     | 0.200 | 0.737 | 0.878 |
| HLA-A*0201 | 0.328 | rs892666,rs4959037,rs4678     | 2,1,2 | 0.306 | 0.633 | 0.838 |
| HLA-A*1101 | 0.039 | rs2517754,rs7745235           | 2,1   | 0.039 | 1.000 | 1.000 |
| HLA-A*2402 | 0.089 | rs2734984,rs1611589           | 1,1   | 0.111 | 0.780 | 1.000 |
| HLA-A*2601 | 0.022 | rs3823339                     | 3     | 0.061 | 0.349 | 0.960 |
| HLA-A*3101 | 0.033 | rs3823318,rs1061235           | 2,1   | 0.033 | 1.000 | 1.000 |
| HLA-A*6801 | 0.033 | rs2844800                     | 4     | 0.061 | 0.530 | 0.971 |
| HLA-B*1501 | 0.072 | rs2524178,rs3819294           | 3,1   | 0.061 | 0.541 | 0.804 |
| HLA-B*4001 | 0.039 | rs2844580,rs2523694           | 3,2   | 0.067 | 0.566 | 1.000 |
| HLA-B*5101 | 0.028 | rs3905495,rs7450800,rs2471980 | 1,2,3 | 0.061 | 0.272 | 0.787 |
| HLA-B*5201 | 0.017 | rs1062470,rs2844586           | 3,1   | 0.011 | 0.663 | 1.000 |
| HLA-B*5701 | 0.061 | rs3093726                     | 4     | 0.056 | 0.904 | 0.994 |
| HLA-C*0303 | 0.061 | rs6457350,rs2156875           | 2,4   | 0.100 | 0.473 | 0.899 |
| HLA-C*0401 | 0.083 | rs7451258,rs12662501          | 2,1   | 0.078 | 0.928 | 1.000 |
| HLA-C*0602 | 0.117 | rs3130457                     | 1     | 0.261 | 0.327 | 0.783 |

Supplementary Table 4 - Cross-panel performance of HLA tags

|              |       |                     |     |       |       |       |
|--------------|-------|---------------------|-----|-------|-------|-------|
| HLA-C*0702   | 0.206 | rs2001181           | 1   | 0.206 | 0.933 | 0.966 |
| HLA-C*1202   | 0.011 | rs3094663,rs2073723 | 2,4 | 0.011 | 1.000 | 1.000 |
| HLA-C*1203   | 0.017 | rs6929434           | 4   | 0.022 | 0.746 | 0.994 |
| HLA-C*1402   | 0.017 | rs3095301,rs2073716 | 4,2 | 0.022 | 0.746 | 1.000 |
| HLA-DQA*0102 | 0.239 | rs5875382,rs1063355 | 3,1 | 0.200 | 0.581 | 0.854 |
| HLA-DQA*0301 | 0.228 | rs2395533,rs6903433 | 4,3 | 0.117 | 0.214 | 0.692 |
| HLA-DQA*0501 | 0.178 | rs4639334,rs6908943 | 2,3 | 0.228 | 0.675 | 0.901 |
| HLA-DQB*0201 | 0.156 | rs4988889           | 3   | 0.150 | 0.958 | 0.993 |
| HLA-DQB*0301 | 0.167 | rs6928482,rs1056315 | 3,1 | 0.161 | 0.808 | 0.917 |
| HLA-DQB*0302 | 0.144 | rs6906021,rs9275184 | 4,3 | 0.150 | 0.957 | 1.000 |
| HLA-DQB*0303 | 0.061 | rs2395533,rs2856683 | 4,4 | 0.061 | 1.000 | 1.000 |
| HLA-DQB*0503 | 0.039 | rs1794265,rs241446  | 2,2 | 0.022 | 0.562 | 1.000 |
| HLA-DQB*0601 | 0.006 | rs7744001,rs6928482 | 1,1 | 0.006 | 1.000 | 1.000 |
| HLA-DRB*0701 | 0.100 | rs3129859,rs2395177 | 3,2 | 0.022 | 0.205 | 1.000 |
| HLA-DRB*1301 | 0.044 | rs3873444           | 2   | 0.106 | 0.292 | 0.805 |
| HLA-DRB*1502 | 0.006 | rs2858880           | 1   | 0.006 | 1.000 | 1.000 |

**tags from JPT**

|              |       |                               |       |       |       |       |
|--------------|-------|-------------------------------|-------|-------|-------|-------|
| HLA-A*0206   | 0.006 | rs892666,rs2517699            | 4,2   | 0.022 | 0.246 | 1.000 |
| HLA-A*0301   | 0.094 | rs2524172                     | 3     | 0.117 | 0.351 | 0.651 |
| HLA-A*1101   | 0.039 | rs2893998                     | 2     | 0.133 | 0.263 | 0.902 |
| HLA-A*2402   | 0.089 | rs1611589,rs2275854           | 1,2   | 0.289 | 0.240 | 1.000 |
| HLA-A*2601   | 0.022 | rs3823339,rs1045251,rs3132571 | 2,4,1 | 0.006 | 0.246 | 1.000 |
| HLA-A*3101   | 0.033 | rs1061235,rs1150739           | 1,1   | 0.033 | 1.000 | 1.000 |
| HLA-B*0702   | 0.183 | rs2523480                     | 2     | 0.178 | 0.891 | 0.955 |
| HLA-B*1302   | 0.017 | rs12191164                    | 3     | 0.017 | 1.000 | 1.000 |
| HLA-B*4403   | 0.022 | rs2844523                     | 2     | 0.061 | 0.349 | 0.960 |
| HLA-C*0303   | 0.061 | rs4084093,rs2853950,rs6457388 | 4,3,4 | 0.111 | 0.329 | 0.795 |
| HLA-C*0304   | 0.039 | rs2853950,rs3873386           | 1,2   | 0.100 | 0.364 | 1.000 |
| HLA-C*0702   | 0.206 | rs2001181                     | 1     | 0.206 | 0.933 | 0.966 |
| HLA-C*1202   | 0.011 | rs6923313,rs3873386           | 3,2   | 0.039 | 0.278 | 1.000 |
| HLA-C*1502   | 0.028 | rs2240066                     | 1     | 0.033 | 0.829 | 0.994 |
| HLA-DQA*0101 | 0.133 | rs6927022,rs2647050,rs6932517 | 4,1,2 | 0.094 | 0.678 | 1.000 |
| HLA-DQA*0102 | 0.239 | rs8180664,rs3134975           | 2,4   | 0.267 | 0.707 | 0.905 |
| HLA-DQA*0401 | 0.033 | rs1061172,rs1056315           | 3,2   | 0.033 | 1.000 | 1.000 |
| HLA-DQA*0501 | 0.178 | rs7769073,rs2097432           | 1,4   | 0.183 | 0.630 | 0.803 |
| HLA-DQB*0301 | 0.167 | rs1056315                     | 2     | 0.233 | 0.497 | 0.800 |
| HLA-DQB*0302 | 0.144 | rs9275184,rs393906            | 3,1   | 0.144 | 0.828 | 0.910 |
| HLA-DQB*0501 | 0.094 | rs6457614                     | 1     | 0.094 | 1.000 | 1.000 |
| HLA-DQB*0601 | 0.006 | rs7744001,rs1063355           | 1,1   | 0.011 | 0.497 | 1.000 |
| HLA-DQB*0602 | 0.200 | rs5875382,rs2647012           | 3,4   | 0.289 | 0.615 | 1.000 |

**CHB**

| HLA allele   | frequency | tags from YRI                 | allele | frequency | rsquared | dprime |
|--------------|-----------|-------------------------------|--------|-----------|----------|--------|
| HLA-A*0201   | 0.233     | rs4713240,rs3132682           | 3,2    | 0.356     | 0.334    | 0.778  |
| HLA-A*0301   | 0.022     | rs2524024                     | 1      | 0.067     | 0.318    | 0.955  |
| HLA-A*2601   | 0.011     | rs3823339                     | 3      | 0.011     | 1.000    | 1.000  |
| HLA-A*3001   | 0.056     | rs1633005,rs2057727           | 4,4    | 0.089     | 0.367    | 0.780  |
| HLA-A*3303   | 0.078     | rs6921921,rs2523945           | 1,3    | 0.111     | 0.475    | 0.839  |
| HLA-A*6801   | 0.022     | rs2735068,rs2524198           | 2,2    | 0.022     | 1.000    | 1.000  |
| HLA-C*0102   | 0.178     | rs4122190                     | 1      | 0.133     | 0.712    | 0.949  |
| HLA-C*0302   | 0.044     | rs2074488                     | 3      | 0.167     | 0.233    | 0.872  |
| HLA-C*0401   | 0.044     | rs4386816                     | 4      | 0.167     | 0.233    | 0.872  |
| HLA-C*1203   | 0.033     | rs6929434                     | 4      | 0.033     | 1.000    | 1.000  |
| HLA-DQA*0101 | 0.100     | rs3134605,rs2858330,rs1612904 | 1,1,1  | 0.056     | 0.529    | 1.000  |
| HLA-DQA*0201 | 0.067     | rs3844313,rs2647012           | 1,2    | 0.056     | 0.824    | 1.000  |
| HLA-DQA*0301 | 0.322     | rs5875382,rs6457617           | 3,1    | 0.400     | 0.634    | 0.943  |
| HLA-DQA*0401 | 0.022     | rs4639334,rs1061172           | 2,3    | 0.100     | 0.205    | 1.000  |

Supplementary Table 4 - Cross-panel performance of HLA tags

|                      |       |                               |       |       |       |       |
|----------------------|-------|-------------------------------|-------|-------|-------|-------|
| HLA-DQA*0501         | 0.122 | rs4424079,rs2284189           | 3,1   | 0.233 | 0.458 | 0.873 |
| HLA-DQB*0201         | 0.111 | rs4988889                     | 3     | 0.111 | 1.000 | 1.000 |
| HLA-DQB*0301         | 0.167 | rs6928482,rs1056315           | 3,1   | 0.167 | 1.000 | 1.000 |
| HLA-DQB*0302         | 0.067 | rs7454108                     | 4     | 0.067 | 0.413 | 0.643 |
| HLA-DQB*0503         | 0.044 | rs1612904,rs2856717           | 1,4   | 0.056 | 0.791 | 1.000 |
| HLA-DQB*0602         | 0.044 | rs5875382,rs3134975           | 3,4   | 0.044 | 1.000 | 1.000 |
| HLA-DRB*1201         | 0.056 | rs4248166,rs6918223           | 2,2   | 0.211 | 0.220 | 1.000 |
| HLA-DRB*1302         | 0.033 | rs2157339,rs7756467           | 1,4   | 0.011 | 0.326 | 1.000 |
| <b>tags from CEU</b> |       |                               |       |       |       |       |
| HLA-A*0101           | 0.022 | rs1611635,rs10947088          | 4,4   | 0.033 | 0.659 | 1.000 |
| HLA-A*0201           | 0.233 | rs2844821,rs762324            | 3,2   | 0.322 | 0.473 | 0.859 |
| HLA-A*0206           | 0.056 | rs3116820,rs6457109           | 3,3   | 0.022 | 0.386 | 1.000 |
| HLA-A*0301           | 0.022 | rs9380122,rs9259817           | 4,2   | 0.067 | 0.318 | 1.000 |
| HLA-A*1101           | 0.233 | rs29233                       | 2     | 0.144 | 0.271 | 0.626 |
| HLA-A*2402           | 0.156 | rs3893538,rs2523933           | 2,1   | 0.089 | 0.530 | 1.000 |
| HLA-A*2601           | 0.011 | rs2301751,rs4678              | 4,2   | 0.022 | 0.494 | 1.000 |
| HLA-A*3001           | 0.056 | rs11961013                    | 3     | 0.044 | 0.427 | 0.727 |
| HLA-A*3101           | 0.033 | rs1061235                     | 4     | 0.111 | 0.276 | 0.920 |
| HLA-A*3201           | 0.022 | rs1611578,rs3130244           | 3,2   | 0.022 | 1.000 | 1.000 |
| HLA-A*6801           | 0.022 | rs1610714,rs2571375           | 3,3   | 0.022 | 0.239 | 0.489 |
| HLA-B*0801           | 0.022 | rs6457374,rs2844535           | 3,2   | 0.056 | 0.386 | 1.000 |
| HLA-B*1302           | 0.056 | rs12191164                    | 3     | 0.056 | 0.332 | 0.576 |
| HLA-C*0102           | 0.178 | rs9380234                     | 2     | 0.178 | 0.596 | 0.772 |
| HLA-C*0303           | 0.078 | rs1265100,rs7745906           | 1,1   | 0.089 | 0.864 | 1.000 |
| HLA-C*0602           | 0.078 | rs887466,rs4379333            | 3,2   | 0.122 | 0.606 | 1.000 |
| HLA-C*0702           | 0.200 | rs3132572,rs2001181           | 1,1   | 0.200 | 1.000 | 1.000 |
| HLA-C*1203           | 0.033 | rs3130457,rs2248902           | 1,4   | 0.033 | 1.000 | 1.000 |
| HLA-DQA*0101         | 0.100 | rs6457614,rs1794265           | 1,3   | 0.078 | 0.208 | 0.511 |
| HLA-DQA*0301         | 0.322 | rs3129883,rs7745002,rs3844313 | 2,2,3 | 0.378 | 0.699 | 0.945 |
| HLA-DQA*0501         | 0.122 | rs10485326,rs2040406          | 4,1   | 0.211 | 0.520 | 0.899 |
| HLA-DQB*0201         | 0.111 | rs4988889                     | 3     | 0.111 | 1.000 | 1.000 |
| HLA-DQB*0301         | 0.167 | rs7744001,rs2856691           | 1,2   | 0.156 | 0.921 | 1.000 |
| HLA-DQB*0302         | 0.067 | rs7454108,rs2071876           | 2,2   | 0.067 | 0.413 | 0.643 |
| HLA-DQB*0503         | 0.044 | rs1794265                     | 3     | 0.067 | 0.651 | 0.977 |
| HLA-DRB*0301         | 0.067 | rs2040410                     | 3     | 0.067 | 0.216 | 0.464 |
| HLA-DRB*1302         | 0.033 | rs4434496,rs6901541           | 4,4   | 0.111 | 0.276 | 1.000 |
| HLA-DRB*1502         | 0.022 | rs2858880                     | 1     | 0.022 | 1.000 | 1.000 |
| <b>tags from JPT</b> |       |                               |       |       |       |       |
| HLA-A*0201           | 0.233 | rs9348834,rs6457110           | 4,1   | 0.256 | 0.777 | 0.936 |
| HLA-A*0206           | 0.056 | rs892666,rs2517699            | 4,2   | 0.089 | 0.603 | 1.000 |
| HLA-A*0301           | 0.022 | rs2524172                     | 3     | 0.033 | 0.659 | 0.989 |
| HLA-A*1101           | 0.233 | rs2893998                     | 2     | 0.267 | 0.732 | 0.894 |
| HLA-A*2402           | 0.156 | rs1611589,rs2275854           | 1,2   | 0.167 | 0.770 | 0.914 |
| HLA-A*2601           | 0.011 | rs3823339,rs1045251,rs3132571 | 2,4,1 | 0.011 | 1.000 | 1.000 |
| HLA-A*3001           | 0.056 | rs3218822                     | 1     | 0.056 | 1.000 | 1.000 |
| HLA-A*3303           | 0.078 | rs2524005,rs1150739           | 1,3   | 0.122 | 0.425 | 0.837 |
| HLA-B*1302           | 0.056 | rs12191164                    | 3     | 0.056 | 0.332 | 0.576 |
| HLA-B*4001           | 0.122 | rs7381331                     | 3     | 0.144 | 0.659 | 0.871 |
| HLA-B*4002           | 0.011 | rs3130573,rs3819299           | 4,2   | 0.011 | 1.000 | 1.000 |
| HLA-B*4801           | 0.044 | rs4959069                     | 2     | 0.044 | 1.000 | 1.000 |
| HLA-B*5101           | 0.078 | rs6933050,rs2596560           | 3,4   | 0.089 | 0.407 | 0.686 |
| HLA-B*5201           | 0.044 | rs2523608,rs2596560           | 4,2   | 0.078 | 0.293 | 0.729 |
| HLA-C*0102           | 0.178 | rs1264459,rs2535294,rs2524227 | 1,4,1 | 0.122 | 0.391 | 0.779 |
| HLA-C*0303           | 0.078 | rs4084093,rs2853950,rs6457388 | 4,3,4 | 0.156 | 0.200 | 0.662 |
| HLA-C*0602           | 0.078 | rs3134942                     | 3     | 0.056 | 0.224 | 0.553 |
| HLA-C*0702           | 0.200 | rs2001181                     | 1     | 0.200 | 1.000 | 1.000 |
| HLA-C*0704           | 0.011 | rs3093542                     | 2     | 0.011 | 1.000 | 1.000 |

Supplementary Table 4 - Cross-panel performance of HLA tags

|              |       |                               |       |       |       |       |
|--------------|-------|-------------------------------|-------|-------|-------|-------|
| HLA-C*0801   | 0.144 | rs2524160,rs2524227           | 4,3   | 0.133 | 0.340 | 0.610 |
| HLA-C*1202   | 0.044 | rs6923313,rs3873386           | 3,2   | 0.044 | 0.545 | 0.738 |
| HLA-C*1402   | 0.044 | rs6457300,rs130074            | 4,1   | 0.078 | 0.293 | 0.729 |
| HLA-C*1502   | 0.056 | rs2240066                     | 1     | 0.044 | 0.427 | 0.727 |
| HLA-DQA*0102 | 0.122 | rs8180664,rs3134975           | 2,4   | 0.078 | 0.425 | 0.837 |
| HLA-DQA*0103 | 0.144 | rs7744001,rs1063355           | 1,1   | 0.144 | 0.828 | 0.910 |
| HLA-DQA*0201 | 0.067 | rs12191164                    | 3     | 0.056 | 0.269 | 0.565 |
| HLA-DQA*0301 | 0.322 | rs5875382,rs2856716,rs6457617 | 3,1,1 | 0.367 | 0.734 | 0.946 |
| HLA-DQA*0401 | 0.022 | rs1061172,rs1056315           | 3,2   | 0.022 | 1.000 | 1.000 |
| HLA-DQB*0301 | 0.167 | rs1056315                     | 2     | 0.233 | 0.657 | 0.920 |
| HLA-DQB*0302 | 0.067 | rs9275184,rs393906            | 3,1   | 0.056 | 0.269 | 0.571 |
| HLA-DQB*0303 | 0.189 | rs2395533,rs2300825,rs3998159 | 4,3,4 | 0.222 | 0.815 | 1.000 |
| HLA-DQB*0401 | 0.067 | rs2395533,rs2300825           | 4,1   | 0.078 | 0.847 | 1.000 |
| HLA-DQB*0601 | 0.144 | rs7744001,rs1063355           | 1,1   | 0.144 | 1.000 | 1.000 |
| HLA-DQB*0602 | 0.044 | rs5875382,rs2647012           | 3,4   | 0.100 | 0.419 | 1.000 |
| HLA-DRB*0401 | 0.022 | rs1150758                     | 2     | 0.022 | 0.239 | 0.489 |
| HLA-DRB*0701 | 0.067 | rs3134942                     | 3     | 0.056 | 0.269 | 0.565 |
| HLA-DRB*0802 | 0.022 | rs3129888,rs2239800           | 3,1   | 0.011 | 0.494 | 1.000 |
| HLA-DRB*0901 | 0.178 | rs2187818,rs5000803,rs7756741 | 1,2,1 | 0.167 | 0.530 | 0.757 |
| HLA-DRB*1302 | 0.033 | rs6936204,rs2157339           | 3,1   | 0.022 | 0.659 | 1.000 |
| HLA-DRB*1502 | 0.022 | rs3135365,rs7382794           | 3,1   | 0.022 | 0.239 | 0.489 |

## JPT

| HLA allele   | frequency | tags from YRI                 | allele | frequency | rsquared | dprime |
|--------------|-----------|-------------------------------|--------|-----------|----------|--------|
| HLA-A*0201   | 0.125     | rs4713240,rs3132682           | 3,2    | 0.171     | 0.424    | 0.781  |
| HLA-A*2601   | 0.068     | rs3823339                     | 3      | 0.114     | 0.571    | 0.951  |
| HLA-A*3303   | 0.114     | rs6921921,rs2523945           | 1,3    | 0.091     | 0.576    | 0.859  |
| HLA-B*0702   | 0.057     | rs2523618                     | 4      | 0.171     | 0.293    | 0.880  |
| HLA-B*4403   | 0.080     | rs2769                        | 2      | 0.091     | 0.864    | 0.988  |
| HLA-C*0702   | 0.182     | rs9264731                     | 1      | 0.171     | 0.925    | 0.986  |
| HLA-DQA*0101 | 0.114     | rs3134605,rs2858330,rs1612904 | 1,1,1  | 0.091     | 0.402    | 0.718  |
| HLA-DQA*0201 | 0.011     | rs3844313,rs2647012           | 1,2    | 0.011     | 1.000    | 1.000  |
| HLA-DQA*0301 | 0.352     | rs5875382,rs6457617           | 3,1    | 0.386     | 0.864    | 1.000  |
| HLA-DQA*0401 | 0.057     | rs4639334,rs1061172           | 2,3    | 0.068     | 0.823    | 1.000  |
| HLA-DQA*0501 | 0.080     | rs4424079,rs2284189           | 3,1    | 0.171     | 0.421    | 0.901  |
| HLA-DQB*0201 | 0.011     | rs4988889                     | 3      | 0.011     | 1.000    | 1.000  |
| HLA-DQB*0301 | 0.102     | rs6928482,rs1056315           | 3,1    | 0.091     | 0.878    | 1.000  |
| HLA-DQB*0302 | 0.091     | rs7454108                     | 4      | 0.091     | 0.744    | 0.862  |
| HLA-DQB*0501 | 0.057     | rs6457614                     | 1      | 0.057     | 1.000    | 1.000  |
| HLA-DQB*0503 | 0.046     | rs1612904,rs2856717           | 1,4    | 0.046     | 1.000    | 1.000  |
| HLA-DQB*0602 | 0.102     | rs5875382,rs3134975           | 3,4    | 0.102     | 1.000    | 1.000  |
| HLA-DQB*0604 | 0.080     | rs3129848,rs2858867,rs1978029 | 4,2,4  | 0.057     | 0.427    | 0.783  |
| HLA-DRB*1301 | 0.011     | rs3134942,rs3763308,rs7451962 | 3,4,2  | 0.046     | 0.241    | 1.000  |
| HLA-DRB*1302 | 0.091     | rs2157339,rs7756467           | 1,4    | 0.046     | 0.476    | 1.000  |
| HLA-DRB*1401 | 0.034     | rs1612904,rs2856717           | 1,4    | 0.046     | 0.314    | 0.651  |

### tags from CEU

|            |       |                            |       |       |       |       |
|------------|-------|----------------------------|-------|-------|-------|-------|
| HLA-A*0201 | 0.125 | rs2844821,rs762324         | 3,2   | 0.182 | 0.286 | 0.667 |
| HLA-A*0206 | 0.091 | rs3116820,rs6457109        | 3,3   | 0.057 | 0.367 | 0.780 |
| HLA-A*0301 | 0.011 | rs9380122,rs9259817        | 4,2   | 0.023 | 0.494 | 1.000 |
| HLA-A*1101 | 0.068 | rs29233                    | 2     | 0.023 | 0.318 | 0.953 |
| HLA-A*2402 | 0.341 | rs3893538,rs2523933        | 2,1   | 0.159 | 0.291 | 0.892 |
| HLA-A*3001 | 0.011 | rs11961013                 | 3     | 0.011 | 1.000 | 1.000 |
| HLA-A*3101 | 0.114 | rs1061235                  | 4     | 0.227 | 0.436 | 0.872 |
| HLA-B*0702 | 0.057 | rs2596438,rs805288         | 3,2   | 0.080 | 0.697 | 1.000 |
| HLA-B*1302 | 0.011 | rs12191164                 | 3     | 0.011 | 1.000 | 1.000 |
| HLA-B*4002 | 0.148 | rs3819285                  | 2     | 0.193 | 0.724 | 0.947 |
| HLA-B*4402 | 0.011 | rs3130501,rs2769,rs2844533 | 2,4,4 | 0.011 | 1.000 | 1.000 |

Supplementary Table 4 - Cross-panel performance of HLA tags

|                      |       |                               |       |       |       |       |
|----------------------|-------|-------------------------------|-------|-------|-------|-------|
| HLA-C*0102           | 0.148 | rs9380234                     | 2     | 0.171 | 0.844 | 0.973 |
| HLA-C*0303           | 0.148 | rs1265100,rs7745906           | 1,1   | 0.148 | 0.301 | 0.549 |
| HLA-C*0401           | 0.023 | rs9461684                     | 3     | 0.023 | 0.239 | 0.488 |
| HLA-C*0602           | 0.011 | rs887466,rs4379333            | 3,2   | 0.023 | 0.494 | 1.000 |
| HLA-C*0702           | 0.182 | rs3132572,rs2001181           | 1,1   | 0.193 | 0.928 | 0.986 |
| HLA-C*0704           | 0.011 | rs2524050,rs2256583           | 4,3   | 0.011 | 1.000 | 1.000 |
| HLA-C*1402           | 0.080 | rs2517439,rs2240061           | 1,2   | 0.046 | 0.292 | 0.728 |
| HLA-DQA*0102         | 0.193 | rs14004,rs6457594             | 3,1   | 0.284 | 0.343 | 0.754 |
| HLA-DQA*0301         | 0.352 | rs3129883,rs7745002,rs3844313 | 2,2,3 | 0.375 | 0.729 | 0.897 |
| HLA-DQA*0501         | 0.080 | rs10485326,rs2040406          | 4,1   | 0.114 | 0.674 | 0.963 |
| HLA-DQB*0201         | 0.011 | rs4988889                     | 3     | 0.011 | 1.000 | 1.000 |
| HLA-DQB*0301         | 0.102 | rs7744001,rs2856691           | 1,2   | 0.068 | 0.426 | 0.814 |
| HLA-DQB*0302         | 0.091 | rs7454108,rs2071876           | 2,2   | 0.091 | 0.744 | 0.862 |
| HLA-DQB*0501         | 0.057 | rs6457614                     | 1     | 0.057 | 1.000 | 1.000 |
| HLA-DQB*0601         | 0.171 | rs2858880                     | 1     | 0.102 | 0.297 | 0.677 |
| HLA-DRB*1302         | 0.091 | rs4434496,rs6901541           | 4,4   | 0.102 | 0.878 | 1.000 |
| HLA-DRB*1502         | 0.102 | rs2858880                     | 1     | 0.102 | 0.566 | 0.752 |
| <b>tags from CHB</b> |       |                               |       |       |       |       |
| HLA-A*0201           | 0.125 | rs892666,rs4959037,rs4678     | 2,1,2 | 0.114 | 0.897 | 1.000 |
| HLA-A*0206           | 0.091 | rs6457109,rs9260988           | 3,1   | 0.080 | 0.864 | 1.000 |
| HLA-A*1101           | 0.068 | rs2517754,rs7745235           | 2,1   | 0.068 | 1.000 | 1.000 |
| HLA-A*2402           | 0.341 | rs2734984,rs1611589           | 1,1   | 0.352 | 0.951 | 1.000 |
| HLA-A*2601           | 0.068 | rs3823339                     | 3     | 0.114 | 0.571 | 0.951 |
| HLA-A*3001           | 0.011 | rs3218822                     | 1     | 0.011 | 1.000 | 1.000 |
| HLA-A*3101           | 0.114 | rs3823318,rs1061235           | 2,1   | 0.125 | 0.704 | 0.886 |
| HLA-A*3303           | 0.114 | rs2524005,rs2855591           | 1,1   | 0.216 | 0.354 | 0.872 |
| HLA-B*1501           | 0.057 | rs2524178,rs3819294           | 3,1   | 0.080 | 0.223 | 0.565 |
| HLA-B*3901           | 0.046 | rs1811197,rs2844575           | 4,2   | 0.023 | 0.488 | 1.000 |
| HLA-B*4001           | 0.057 | rs2844580,rs2523694           | 3,2   | 0.148 | 0.348 | 1.000 |
| HLA-B*4801           | 0.011 | rs4959069                     | 2     | 0.011 | 1.000 | 1.000 |
| HLA-B*5201           | 0.091 | rs1062470,rs2844586           | 3,1   | 0.080 | 0.406 | 0.686 |
| HLA-B*5401           | 0.057 | rs3130786,rs3819284           | 1,1   | 0.080 | 0.427 | 0.783 |
| HLA-B*5601           | 0.011 | rs3130977,rs1063632           | 3,4   | 0.023 | 0.494 | 1.000 |
| HLA-B*5801           | 0.011 | rs3134792,rs4713518           | 3,1   | 0.011 | 1.000 | 1.000 |
| HLA-C*0303           | 0.148 | rs6457350,rs2156875           | 2,4   | 0.125 | 0.381 | 0.680 |
| HLA-C*0401           | 0.023 | rs7451258,rs12662501          | 2,1   | 0.023 | 1.000 | 1.000 |
| HLA-C*0702           | 0.182 | rs2001181                     | 1     | 0.182 | 1.000 | 1.000 |
| HLA-C*0704           | 0.011 | rs2395031                     | 3     | 0.023 | 0.494 | 0.989 |
| HLA-C*0801           | 0.057 | rs2524100                     | 1     | 0.068 | 0.823 | 0.988 |
| HLA-C*1202           | 0.091 | rs3094663,rs2073723           | 2,4   | 0.091 | 0.744 | 0.862 |
| HLA-C*1402           | 0.080 | rs3095301,rs2073716           | 4,2   | 0.068 | 0.847 | 1.000 |
| HLA-DQA*0101         | 0.114 | rs8365,rs482044,rs532098      | 2,2,2 | 0.080 | 0.310 | 0.678 |
| HLA-DQA*0103         | 0.182 | rs7744001,rs1063355,rs2187686 | 1,1,2 | 0.148 | 0.780 | 1.000 |
| HLA-DQA*0201         | 0.011 | rs7763805,rs3844313           | 2,1   | 0.011 | 1.000 | 1.000 |
| HLA-DQA*0301         | 0.352 | rs2395533,rs6903433           | 4,3   | 0.330 | 0.722 | 0.894 |
| HLA-DQA*0601         | 0.011 | rs1061172,rs3129718           | 3,1   | 0.011 | 1.000 | 1.000 |
| HLA-DQB*0201         | 0.011 | rs4988889                     | 3     | 0.011 | 1.000 | 1.000 |
| HLA-DQB*0301         | 0.102 | rs6928482,rs1056315           | 3,1   | 0.091 | 0.878 | 1.000 |
| HLA-DQB*0302         | 0.091 | rs6906021,rs9275184           | 4,3   | 0.102 | 0.878 | 1.000 |
| HLA-DQB*0303         | 0.182 | rs2395533,rs2856683           | 4,4   | 0.227 | 0.756 | 1.000 |
| HLA-DQB*0401         | 0.091 | rs2077580,rs2395533,rs2300825 | 2,4,1 | 0.091 | 1.000 | 1.000 |
| HLA-DQB*0502         | 0.011 | rs7744001,rs6906021,rs2300825 | 3,2,3 | 0.011 | 1.000 | 1.000 |
| HLA-DQB*0601         | 0.171 | rs7744001,rs6928482           | 1,1   | 0.171 | 0.576 | 0.759 |
| HLA-DQB*0604         | 0.080 | rs11758998                    | 2     | 0.080 | 0.286 | 0.534 |
| HLA-DRB*0701         | 0.011 | rs3129859,rs2395177           | 3,2   | 0.011 | 1.000 | 1.000 |
| HLA-DRB*0803         | 0.034 | rs3129859,rs1041885,rs154984  | 2,4,2 | 0.068 | 0.482 | 1.000 |
| HLA-DRB*0901         | 0.171 | rs2395185,rs2516049           | 1,4   | 0.273 | 0.452 | 0.908 |
| HLA-DRB*1302         | 0.091 | rs11758998                    | 2     | 0.080 | 0.864 | 0.988 |
| HLA-DRB*1501         | 0.102 | rs7773756,rs6903608,rs620202  | 4,3,2 | 0.114 | 0.499 | 0.749 |

Supplementary Table 4 - Cross-panel performance of HLA tags

|              |       |           |   |       |       |       |
|--------------|-------|-----------|---|-------|-------|-------|
| HLA-DRB*1502 | 0.102 | rs2858880 | 1 | 0.102 | 0.566 | 0.752 |
|--------------|-------|-----------|---|-------|-------|-------|
