# Supplementary material
Source: PubMed Central journal article supplement (PMC2670196)
Supplement: NIHMS4414-supplement-Table_5.pdf [file NIHMS4414-supplement-Table_5.pdf]

**Supplementary Table 5:** List of top-ranking SNPs and haplotypes with evidence for recent positive selection using EHH-based methods. The methods used are the traditional LRH method (Sabeti et al. 2002) for testing single SNPs, LRH method for testing haplotypes, and the IHS method (Voigt et al. 2006) for single SNPs. The population and specific method is presented along with the significance score (the number of standard deviations the score is away from the expected mean of the distribution.) The build 34 position, SNP IDs and genes in the tested core region are also given. SNPs are listed more than once if a signal of selection was detected by more than one method.

| Population  | Method         | Start Base | End Base | Significance Score | SNPs in the core region                                                                                | Coding, Non-Synonymous SNPs | Genes In Region                                                                                                                                                       |
|-------------|----------------|------------|----------|--------------------|--------------------------------------------------------------------------------------------------------|-----------------------------|-----------------------------------------------------------------------------------------------------------------------------------------------------------------------|
| CHB and JPT | IHS 1SNP       | 26308656   | 26308656 | 3.11               | rs806794                                                                                               |                             | HIST1H1E, HIST1H2BD, HIST1H2BD, HIST1H2BE, HIST1H4D, HIST1H3D, HIST1H2AD, HIST1H2BF, HIST1H4E, HIST1H2BG, HIST1H2AE, HIST1H3E, HIST1H1D, HIST1H4F, HIST1H4G, HIST1H3F |
| CHB and JPT | IHS 1SNP       | 26325707   | 26325707 | 2.17               | rs1997768                                                                                              |                             | HIST1H2BD, HIST1H2BE, HIST1H4D, HIST1H3D, HIST1H2AD, HIST1H2BF, HIST1H4E, HIST1H2BG, HIST1H2AE, HIST1H3E, HIST1H1D, HIST1H4F, HIST1H4G, HIST1H3F, HIST1H2BH           |
| CHB and JPT | IHS 1SNP       | 26327723   | 26327723 | 2.50               | rs11757754                                                                                             |                             | HIST1H2BD, HIST1H2BE, HIST1H4D, HIST1H3D, HIST1H2AD, HIST1H2BF, HIST1H4E, HIST1H2BG, HIST1H2AE, HIST1H3E, HIST1H1D, HIST1H4F, HIST1H4G, HIST1H3F, HIST1H2BH           |
| CHB and JPT | IHS 1SNP       | 26334011   | 26334011 | 3.15               | rs811041                                                                                               |                             | HIST1H2BE, HIST1H4D, HIST1H3D, HIST1H2AD, HIST1H2BF, HIST1H4E, HIST1H2BG, HIST1H2AE, HIST1H3E, HIST1H1D, HIST1H4F, HIST1H4G, HIST1H3F, HIST1H2BH, HIST1H3G, HIST1H2BI |
| YRI         | REHH 1 SNP     | 26334011   | 26334011 | 3.30               | rs811041                                                                                               |                             | HIST1H2BE, HIST1H4D, HIST1H3D, HIST1H2AD, HIST1H2BF, HIST1H4E, HIST1H2BG, HIST1H2AE, HIST1H3E, HIST1H1D, HIST1H4F, HIST1H4G, HIST1H3F, HIST1H2BH, HIST1H3G, HIST1H2BI |
| CHB and JPT | IHS 1SNP       | 26341366   | 26341366 | 3.32               | rs10946808                                                                                             |                             | HIST1H2BE, HIST1H4D, HIST1H3D, HIST1H2AD, HIST1H2BF, HIST1H4E, HIST1H2BG, HIST1H2AE, HIST1H3E, HIST1H1D, HIST1H4F, HIST1H4G, HIST1H3F, HIST1H2BH, HIST1H3G, HIST1H2BI |
| CHB and JPT | IHS 1SNP       | 26348603   | 26348603 | 2.49               | rs3734533                                                                                              |                             | HIST1H3D, HIST1H2AD, HIST1H2BF, HIST1H4E, HIST1H2BG, HIST1H2AE, HIST1H3E, HIST1H1D, HIST1H4F, HIST1H4G, HIST1H3F, HIST1H2BH, HIST1H3G, HIST1H2BI, HIST1H4H            |
| CHB and JPT | IHS 1SNP       | 26367727   | 26367727 | 2.63               | rs806786                                                                                               |                             | HIST1H2BG, HIST1H2AE, HIST1H3E, HIST1H1D, HIST1H4F, HIST1H4G, HIST1H3F, HIST1H2BH, HIST1H3G, HIST1H2BI, HIST1H4H                                                      |
| CHB and JPT | REHH 1 SNP     | 26518779   | 26518779 | 3.13               | rs1796520                                                                                              |                             | BTN3A2, BTN2A2, BTN3A1, BTN2A3, BTN3A3, BTN2A1,                                                                                                                       |
| CHB and JPT | REHH 1 SNP     | 26523616   | 26523616 | 3.13               | rs742090                                                                                               |                             | BTN3A2, BTN2A2, BTN3A1, BTN2A3, BTN3A3, BTN2A1,                                                                                                                       |
| CHB and JPT | REHH 1 SNP     | 26529371   | 26529371 | 3.13               | rs1796521                                                                                              |                             | BTN3A2, BTN2A2, BTN3A1, BTN2A3, BTN3A3, BTN2A1,                                                                                                                       |
| YRI         | REHH 1 SNP     | 27066763   | 27066763 | 3.01               | rs12663161                                                                                             |                             | GUSBL1                                                                                                                                                                |
| YRI         | REHH Haplotype | 27074642   | 27096396 | 3.51               | rs12201466,rs11758237,rs9467957,rs7765489,rs7770815,rs12204753,rs7748354,rs7752299,rs7752337,rs6920115 |                             | GUSBL1                                                                                                                                                                |
| YRI         | REHH 1 SNP     | 27082258   | 27082258 | 3.01               | rs7765489                                                                                              |                             | GUSBL1                                                                                                                                                                |
| YRI         | REHH 1 SNP     | 27096971   | 27096971 | 3.01               | rs7741445                                                                                              |                             |                                                                                                                                                                       |
| YRI         | REHH 1 SNP     | 27188184   | 27188184 | 3.07               | rs6921388                                                                                              |                             | HIST1H2BJ, HIST1H2AG, HIST1H2BK, HIST1H4I, HIST1H2AH                                                                                                                  |
| YRI         | REHH 1 SNP     | 27229304   | 27229304 | 3.16               | rs9379960                                                                                              |                             | HIST1H2BJ, HIST1H2AG, HIST1H2BK, HIST1H4I, HIST1H2AH                                                                                                                  |
| YRI         | IHS 1SNP       | 27503743   | 27503743 | 2.111              | rs6926142                                                                                              |                             | LOC441136, ZNF184                                                                                                                                                     |
| YRI         | IHS 1SNP       | 27529283   | 27529283 | 2.476              | rs7744110                                                                                              |                             | ZNF184                                                                                                                                                                |
| YRI         | IHS 1SNP       | 27532353   | 27532353 | 2.678              | rs764460                                                                                               |                             | ZNF184                                                                                                                                                                |
| YRI         | IHS 1SNP       | 27533164   | 27533164 | 2.678              | rs1883216                                                                                              | rs1883216                   | ZNF184                                                                                                                                                                |
| YRI         | IHS 1SNP       | 27538720   | 27538720 | 2.678              | rs6929278                                                                                              |                             | ZNF184                                                                                                                                                                |
| YRI         | IHS 1SNP       | 27543686   | 27543686 | 2.678              | rs2272814                                                                                              |                             | ZNF184                                                                                                                                                                |
| YRI         | IHS 1SNP       | 27547983   | 27547983 | 2.678              | rs7750795                                                                                              |                             | ZNF184                                                                                                                                                                |
| CHB and JPT | REHH 1 SNP     | 27659295   | 27659295 | 3.15               | rs6916878                                                                                              |                             |                                                                                                                                                                       |
| CHB and JPT | REHH 1 SNP     | 27691940   | 27691940 | 3.22               | rs2294480                                                                                              |                             |                                                                                                                                                                       |

|             |                |          |          |       |                                                                                                      |                                                   |                                                                                                                                                                         |
|-------------|----------------|----------|----------|-------|------------------------------------------------------------------------------------------------------|---------------------------------------------------|-------------------------------------------------------------------------------------------------------------------------------------------------------------------------|
| CHB and JPT | REHH 1 SNP     | 27927332 | 27927332 | 3.18  | rs200988                                                                                             |                                                   | HIST1H2BL, HIST1H2AI, HIST1H3H, HIST1H2AJ, HIST1H2BM, HIST1H4J, HIST1H4K, HIST1H2AK, HIST1H2BN, HIST1H2AL, HIST1H1B, HIST1H3I, HIST1H4L, HIST1H3J, HIST1H2AM, HIST1H2BO |
| CHB and JPT | REHH 1 SNP     | 27943909 | 27943909 | 3.18  | rs200951                                                                                             |                                                   | HIST1H4J, HIST1H4K, HIST1H2AK, HIST1H2BN, HIST1H2AL, HIST1H1B, HIST1H3I, HIST1H4L, HIST1H3J, HIST1H2AM, HIST1H2BO, OR2B2                                                |
| CHB and JPT | REHH 1 SNP     | 28607858 | 28607858 | 3.14  | rs2273106                                                                                            |                                                   | GPX6, GPX5, ZNF452                                                                                                                                                      |
| YRI         | IHS 1SNP       | 28632991 | 28632991 | 3.034 | rs404343                                                                                             |                                                   | GPX6, GPX5, ZNF452                                                                                                                                                      |
| YRI         | IHS 1SNP       | 28634135 | 28634135 | 3.034 | rs434636                                                                                             |                                                   | GPX6, GPX5, ZNF452                                                                                                                                                      |
| YRI         | IHS 1SNP       | 28636949 | 28636949 | 3.217 | rs429875                                                                                             |                                                   | GPX6, GPX5, ZNF452                                                                                                                                                      |
| YRI         | IHS 1SNP       | 28643219 | 28643219 | 3.205 | rs424426                                                                                             |                                                   | GPX5, GPX5, ZNF452                                                                                                                                                      |
| YRI         | IHS 1SNP       | 28647287 | 28647287 | 2.712 | rs449074                                                                                             |                                                   | GPX5, GPX5, ZNF452                                                                                                                                                      |
| YRI         | IHS 1SNP       | 28655133 | 28655133 | 3.236 | rs409029                                                                                             | rs409029                                          | GPX5, GPX5, ZNF452                                                                                                                                                      |
| YRI         | IHS 1SNP       | 28666238 | 28666238 | 3.528 | rs381493                                                                                             |                                                   | ZNF452                                                                                                                                                                  |
| YRI         | IHS 1SNP       | 28805065 | 28805065 | 2.498 | rs2893973                                                                                            |                                                   |                                                                                                                                                                         |
| YRI         | IHS 1SNP       | 28820641 | 28820641 | 2.65  | rs1233579                                                                                            |                                                   |                                                                                                                                                                         |
| YRI         | IHS 1SNP       | 28841393 | 28841393 | 2.362 | rs1233602                                                                                            |                                                   |                                                                                                                                                                         |
| YRI         | IHS 1SNP       | 28859725 | 28859725 | 2.55  | rs1233627                                                                                            |                                                   |                                                                                                                                                                         |
| YRI         | IHS 1SNP       | 28876254 | 28876254 | 3.391 | rs7766699                                                                                            |                                                   |                                                                                                                                                                         |
| YRI         | IHS 1SNP       | 28876685 | 28876685 | 3.391 | rs7767099                                                                                            |                                                   |                                                                                                                                                                         |
| YRI         | IHS 1SNP       | 28877658 | 28877658 | 2.441 | rs2765220                                                                                            |                                                   |                                                                                                                                                                         |
| YRI         | IHS 1SNP       | 28904064 | 28904064 | 4.066 | rs3131337                                                                                            |                                                   |                                                                                                                                                                         |
| CEU         | IHS 1SNP       | 28909376 | 28909376 | 2.632 | rs1002925                                                                                            |                                                   |                                                                                                                                                                         |
| CEU         | IHS 1SNP       | 28914328 | 28914328 | 2.548 | rs209173                                                                                             |                                                   |                                                                                                                                                                         |
| YRI         | IHS 1SNP       | 28932391 | 28932391 | 3.595 | rs3135300                                                                                            |                                                   | RFP, RFP                                                                                                                                                                |
| CEU         | IHS 1SNP       | 28941095 | 28941095 | 2.39  | rs3118370                                                                                            |                                                   | RFP, RFP                                                                                                                                                                |
| YRI         | IHS 1SNP       | 28941095 | 28941095 | 3.595 | rs3118370                                                                                            |                                                   | RFP, RFP                                                                                                                                                                |
| CEU         | IHS 1SNP       | 28945431 | 28945431 | 2.706 | rs3131093                                                                                            |                                                   | RFP, RFP                                                                                                                                                                |
| YRI         | IHS 1SNP       | 28945431 | 28945431 | 4.042 | rs3131093                                                                                            |                                                   | RFP, RFP                                                                                                                                                                |
| CEU         | IHS 1SNP       | 28962263 | 28962263 | 2.659 | rs2032500                                                                                            |                                                   | RFP, RFP                                                                                                                                                                |
| YRI         | IHS 1SNP       | 28962263 | 28962263 | 2.588 | rs2032500                                                                                            |                                                   | RFP, RFP                                                                                                                                                                |
| CEU         | IHS 1SNP       | 28980436 | 28980436 | 2.658 | rs209126                                                                                             |                                                   | RFP, RFP                                                                                                                                                                |
| YRI         | IHS 1SNP       | 28980436 | 28980436 | 2.267 | rs209126                                                                                             |                                                   | RFP, RFP                                                                                                                                                                |
| YRI         | IHS 1SNP       | 28995698 | 28995698 | 3.442 | rs9468444                                                                                            |                                                   | RFP, RFP                                                                                                                                                                |
| YRI         | REHH Haplotype | 29377077 | 29378508 | 3.15  | rs7754926,rs3117424,rs4594993                                                                        |                                                   | OR5U1                                                                                                                                                                   |
| CEU         | IHS 1SNP       | 30203380 | 30203380 | 2.694 | rs1419671                                                                                            |                                                   | TRIM31, TRIM40, TRIM10, TRIM15,                                                                                                                                         |
| CEU         | IHS 1SNP       | 30212706 | 30212706 | 3.304 | rs2857440                                                                                            |                                                   | TRIM31, TRIM40, TRIM10, TRIM15, TRIM26                                                                                                                                  |
| CEU         | IHS 1SNP       | 30221167 | 30221167 | 2.677 | rs757262                                                                                             | rs757262                                          | TRIM31, TRIM40, TRIM10, TRIM15, TRIM26                                                                                                                                  |
| CEU         | IHS 1SNP       | 30221754 | 30221754 | 2.717 | rs757259                                                                                             | rs757259                                          | TRIM31, TRIM40, TRIM10, TRIM15, TRIM26                                                                                                                                  |
| CEU         | IHS 1SNP       | 30235159 | 30235159 | 4.09  | rs2157678                                                                                            |                                                   | TRIM31, TRIM40, TRIM10, TRIM15, TRIM26                                                                                                                                  |
| CEU         | IHS 1SNP       | 30245901 | 30245901 | 3.098 | rs929156                                                                                             | rs929156                                          | TRIM40, TRIM10, TRIM15, TRIM26                                                                                                                                          |
| CEU         | IHS 1SNP       | 30268985 | 30268985 | 2.76  | rs4711211                                                                                            |                                                   | TRIM40, TRIM10, TRIM15, TRIM26                                                                                                                                          |
| CEU         | REHH Haplotype | 30778589 | 30794581 | 3.59  | rs3132589,rs10947087,rs2269702,rs6929626,rs2844707,rs2075015,rs9262152,rs2517560,rs6925437,rs3132584 | rs3132589,rs2844707,rs2075015,rs9262152,rs2517560 | DHX16, NRM, MDC1, TUBB, FLOT1, IER3,                                                                                                                                    |
| CEU         | REHH Haplotype | 30785488 | 30803601 | 3.86  | rs6929626,rs2844707,rs2075015,rs9262152,rs2517560,rs6925437,rs3132584,rs25527,rs12182166,rs3094127   | rs2844707,rs2075015,rs9262152,rs2517560           | DHX16, NRM, MDC1, TUBB, FLOT1, IER3,                                                                                                                                    |
| CEU         | REHH Haplotype | 30797092 | 30817519 | 3.79  | rs25527,rs12182166,rs3094127,rs9380182,rs3130660,rs8512                                              |                                                   | NRM, MDC1, TUBB, FLOT1, IER3,                                                                                                                                           |

|             |                |          |          |      |                                                                                                        |                              |                                                                                    |
|-------------|----------------|----------|----------|------|--------------------------------------------------------------------------------------------------------|------------------------------|------------------------------------------------------------------------------------|
| CEU         | REHH Haplotype | 30809779 | 30817519 | 3.90 | rs9380182,rs3130660,rs8512                                                                             |                              | NRM, MDC1, TUBB, FLOT1, IER3,                                                      |
| CEU         | REHH 1 SNP     | 30812523 | 30812523 | 3.21 | rs3130660                                                                                              |                              | NRM, MDC1, TUBB, FLOT1, IER3,                                                      |
| CEU         | REHH Haplotype | 30870046 | 30871745 | 3.15 | rs3131064,rs3130641,rs12660883,rs1264376                                                               |                              |                                                                                    |
| CEU         | REHH Haplotype | 30871745 | 30896978 | 3.29 | rs1264376,rs4711235,rs47113376,rs9380194,rs9380197,rs886424,rs2894046,rs2394412,rs47113380,rs6901761   | rs886424,rs2894046,rs2394412 |                                                                                    |
| CEU         | REHH 1 SNP     | 30888179 | 30888179 | 3.11 | rs886424                                                                                               | rs886424                     |                                                                                    |
| CEU         | REHH Haplotype | 30969783 | 30973919 | 3.13 | rs1264318,rs886422,rs1049623,rs2239517,rs2524239,rs2239518,rs2524236,rs2301755,rs1049633,rs8408        |                              | DDR1, GTF2H4, VARSL, SFTPG                                                         |
| CHB and JPT | REHH Haplotype | 30993583 | 31026368 | 3.07 | rs7738138,rs2074506,rs753725,rs4678,rs3873334,rs2844650,rs6933400,rs9368647,rs7341251,rs3132580        | rs2074506,rs4678,rs3132580   | DDR1, GTF2H4, VARSL, SFTPG, DPCR1, C6orf205                                        |
| CHB and JPT | REHH 1 SNP     | 31021699 | 31021699 | 3.59 | rs9368647                                                                                              |                              | DDR1, GTF2H4, VARSL, SFTPG, DPCR1, C6orf205                                        |
| CEU         | REHH Haplotype | 31026368 | 31028814 | 3.34 | rs3132580,rs2240804,rs2532921                                                                          | rs3132580,rs2240804          | GTF2H4, VARSL, SFTPG, DPCR1, C6orf205                                              |
| CEU         | REHH Haplotype | 31026368 | 31028814 | 3.24 | rs3132580,rs2240804,rs2532921                                                                          | rs3132580,rs2240804          | GTF2H4, VARSL, SFTPG, DPCR1, C6orf205                                              |
| CHB and JPT | REHH Haplotype | 31032229 | 31040695 | 3.14 | rs11753326,rs2429557,rs12111193,rs4711250,rs11969139,rs2844697,rs3095150,rs2530715,rs3095089,rs3869092 |                              | GTF2H4, VARSL, SFTPG, DPCR1, C6orf205                                              |
| CHB and JPT | REHH 1 SNP     | 31036514 | 31036514 | 3.61 | rs4711250                                                                                              |                              | GTF2H4, VARSL, SFTPG, DPCR1, C6orf205                                              |
| CHB and JPT | REHH 1 SNP     | 31036514 | 31036514 | 3.61 | rs4711250                                                                                              |                              | GTF2H4, VARSL, SFTPG, DPCR1, C6orf205                                              |
| CEU         | REHH 1 SNP     | 31077212 | 31077212 | 3.33 | rs11964080                                                                                             |                              | DPCR1, C6orf205                                                                    |
| YRI         | REHH 1 SNP     | 31313056 | 31313056 | 3.24 | rs3134768                                                                                              |                              | HCG27, HLA-C                                                                       |
| YRI         | REHH 1 SNP     | 31340517 | 31340517 | 3.45 | rs2524100                                                                                              |                              | HLA-C                                                                              |
| YRI         | REHH Haplotype | 31425890 | 31425899 | 3.61 | NCI_HLAB_5201                                                                                          |                              | HLA-B, MICA                                                                        |
| CEU         | REHH Haplotype | 31449045 | 31459883 | 3.18 | rs4959069,rs2844535,rs2523480                                                                          |                              | HLA-B, MICA                                                                        |
| CHB and JPT | REHH 1 SNP     | 31482535 | 31482535 | 3.28 | rs9380254                                                                                              |                              | MICA                                                                               |
| CEU         | REHH 1 SNP     | 31491573 | 31491573 | 3.40 | rs2596530                                                                                              |                              | MICA, HCP5                                                                         |
| CHB and JPT | REHH 1 SNP     | 31509806 | 31509806 | 3.20 | rs2596466                                                                                              |                              | MICA, HCP5                                                                         |
| CEU         | REHH Haplotype | 31606075 | 31617118 | 3.11 | rs1055388,rs2516393,rs2239528,rs2071593                                                                |                              | MICB, MCCR1, BAT1, ATP6V1G2, ATP6V1G2, NFKBIL1, LTA, TNF, LTB, LST1, NCR3          |
| CEU         | REHH 1 SNP     | 32213325 | 32213325 | 3.47 | rs408359                                                                                               |                              | CREBL1, FKBPL, PRRT1, PPT2, EGFL8, AGPAT1, AGPAT1, RNF5, AGER, PBX2, GPSM3, NOTCH4 |
| CEU         | REHH Haplotype | 32621701 | 32657047 | 3.42 | rs10485327,rs3135005,rs9271366,rs2187668                                                               |                              | HLA-DQB1                                                                           |
| CEU         | REHH 1 SNP     | 32865735 | 32865735 | 3.49 | rs4148880                                                                                              |                              | HLA-DOB, TAP2, PSMB8, TAP1, PSMB9,                                                 |
| CEU         | REHH 1 SNP     | 32901654 | 32901654 | 3.42 | rs10046257                                                                                             |                              | TAP2, TAP2, PSMB8, TAP1, PSMB9, PSMB9, HLA-DMB                                     |
| YRI         | REHH 1 SNP     | 33017337 | 33017337 | 3.08 | rs9276974                                                                                              |                              | HLA-DMA, BRD2, HLA-DOA                                                             |
| YRI         | REHH Haplotype | 33035582 | 33051274 | 3.29 | rs9296068,rs12055709,rs443623,rs763469                                                                 |                              | BRD2, HLA-DOA, HLA-DPA1, HLA-DPB1                                                  |
| CEU         | REHH 1 SNP     | 33037368 | 33037368 | 3.43 | rs6930052                                                                                              |                              | BRD2, HLA-DOA, HLA-DPA1                                                            |
| YRI         | REHH Haplotype | 33075604 | 33087921 | 4.14 | rs588997,rs3077,rs2308935,rs2301220,rs9277341,rs4501465,rs1431399                                      |                              | HLA-DPA1, HLA-DPB1                                                                 |
| YRI         | REHH 1 SNP     | 33086512 | 33086512 | 3.23 | rs9277341                                                                                              |                              | HLA-DPA1, HLA-DPB1                                                                 |
| YRI         | REHH 1 SNP     | 33086512 | 33086512 | 3.14 | rs9277341                                                                                              |                              | HLA-DPA1, HLA-DPB1                                                                 |
| YRI         | REHH 1 SNP     | 33087194 | 33087194 | 3.95 | rs4501465                                                                                              |                              | HLA-DPA1, HLA-DPB1                                                                 |
| YRI         | REHH 1 SNP     | 33100829 | 33100829 | 3.41 | rs9277489                                                                                              |                              | HLA-DPA1, HLA-DPB1                                                                 |

|             |                |          |          |       |                                                                                                |           |                                                                      |
|-------------|----------------|----------|----------|-------|------------------------------------------------------------------------------------------------|-----------|----------------------------------------------------------------------|
| YRI         | REHH 1 SNP     | 33100829 | 33100829 | 3.19  | rs9277489                                                                                      |           | HLA-DPA1, HLA-DPB1                                                   |
| YRI         | REHH 1 SNP     | 33101748 | 33101748 | 3.41  | rs9277535                                                                                      |           | HLA-DPA1, HLA-DPB1                                                   |
| YRI         | REHH 1 SNP     | 33101748 | 33101748 | 3.19  | rs9277535                                                                                      |           | HLA-DPA1, HLA-DPB1                                                   |
| YRI         | REHH 1 SNP     | 33106883 | 33106883 | 3.35  | rs3128917                                                                                      |           | HLA-DPA1, HLA-DPB1                                                   |
| YRI         | IHS 1SNP       | 33106883 | 33106883 | 4.001 | rs3128917                                                                                      |           | HLA-DPA1, HLA-DPB1                                                   |
| YRI         | REHH 1 SNP     | 33106951 | 33106951 | 3.35  | rs3117223                                                                                      |           | HLA-DPA1, HLA-DPB1                                                   |
| YRI         | IHS 1SNP       | 33106951 | 33106951 | 3.179 | rs3117223                                                                                      |           | HLA-DPA1, HLA-DPB1                                                   |
| YRI         | REHH 1 SNP     | 33107779 | 33107779 | 3.10  | rs2295118                                                                                      |           | HLA-DPA1, HLA-DPB1                                                   |
| YRI         | IHS 1SNP       | 33107779 | 33107779 | 3.448 | rs2295118                                                                                      |           | HLA-DPA1, HLA-DPB1                                                   |
| YRI         | REHH 1 SNP     | 33107836 | 33107836 | 3.44  | rs3117222                                                                                      |           | HLA-DPA1, HLA-DPB1                                                   |
| YRI         | IHS 1SNP       | 33107836 | 33107836 | 3.912 | rs3117222                                                                                      |           | HLA-DPA1, HLA-DPB1                                                   |
| YRI         | REHH 1 SNP     | 33108577 | 33108577 | 3.44  | rs3130190                                                                                      |           | HLA-DPA1, HLA-DPB1                                                   |
| YRI         | IHS 1SNP       | 33108577 | 33108577 | 2.608 | rs3130190                                                                                      |           | HLA-DPA1, HLA-DPB1                                                   |
| YRI         | REHH 1 SNP     | 33119153 | 33119153 | 3.44  | rs2064478                                                                                      |           | HLA-DPA1, HLA-DPB1                                                   |
| YRI         | IHS 1SNP       | 33119153 | 33119153 | 2.586 | rs2064478                                                                                      |           | HLA-DPA1, HLA-DPB1                                                   |
| YRI         | REHH 1 SNP     | 33121795 | 33121795 | 3.12  | rs3117231                                                                                      |           | HLA-DPA1, HLA-DPB1                                                   |
| YRI         | IHS 1SNP       | 33133136 | 33133136 | 2.179 | rs3117035                                                                                      |           | HLA-DPA1, HLA-DPB1, COL11A2                                          |
| CEU         | REHH Haplotype | 33231891 | 33239754 | 3.26  | rs6938096,rs213212,rs1606015                                                                   |           | COL11A2, COL11A2, RXRB, SLC39A7, HSD17B8, RING1, VPS52, RPS18        |
| YRI         | REHH 1 SNP     | 33249523 | 33249523 | 3.58  | rs213220                                                                                       |           | COL11A2, RXRB, SLC39A7, HSD17B8, RING1, VPS52, RPS18, B3GALT4, WDR46 |
| YRI         | REHH 1 SNP     | 33393078 | 33393078 | 3.65  | rs2747479                                                                                      |           | KIFC1, PHF1, PHF1, C6orf82, SYNGAP1                                  |
| YRI         | REHH 1 SNP     | 33393078 | 33393078 | 3.17  | rs2747479                                                                                      |           | KIFC1, PHF1, PHF1, C6orf82, SYNGAP1                                  |
| YRI         | REHH Haplotype | 33429133 | 33457442 | 3.17  | rs442745,rs3116713,rs211456,rs1705002,rs413722,rs9394145,rs453590,rs6910748,rs411136,rs9380353 | rs3116713 | KIFC1, PHF1, PHF1, C6orf82, SYNGAP1, ZBTB9                           |
| YRI         | REHH 1 SNP     | 33436273 | 33436273 | 3.63  | rs211456                                                                                       |           | KIFC1, PHF1, PHF1, C6orf82, SYNGAP1, ZBTB9                           |
| YRI         | REHH 1 SNP     | 33463712 | 33463712 | 3.81  | rs1755044                                                                                      |           | KIFC1, PHF1, PHF1, C6orf82, SYNGAP1, ZBTB9                           |
| YRI         | REHH 1 SNP     | 33468471 | 33468471 | 3.37  | rs2247385                                                                                      |           | KIFC1, PHF1, PHF1, C6orf82, SYNGAP1, ZBTB9                           |
| YRI         | REHH 1 SNP     | 33474241 | 33474241 | 5.01  | rs2772372                                                                                      |           | KIFC1, PHF1, PHF1, C6orf82, SYNGAP1, ZBTB9                           |
| YRI         | REHH 1 SNP     | 33479049 | 33479049 | 3.37  | rs1755048                                                                                      |           | PHF1, PHF1, C6orf82, SYNGAP1, ZBTB9                                  |
| YRI         | REHH 1 SNP     | 33492845 | 33492845 | 3.06  | rs3130025                                                                                      |           | SYNGAP1, ZBTB9                                                       |
| YRI         | REHH 1 SNP     | 33533587 | 33533587 | 4.09  | rs6457730                                                                                      |           |                                                                      |
| YRI         | REHH 1 SNP     | 33537912 | 33537912 | 4.25  | rs6924409                                                                                      |           | BAK1                                                                 |
| YRI         | REHH 1 SNP     | 33539926 | 33539926 | 4.09  | rs10452588                                                                                     |           | BAK1                                                                 |
| YRI         | REHH Haplotype | 33549742 | 33549912 | 4.07  | rs9469473,rs6925399,rs9469474                                                                  |           | BAK1                                                                 |
| YRI         | REHH Haplotype | 33549742 | 33549912 | 3.62  | rs9469473,rs6925399,rs9469474                                                                  |           | BAK1                                                                 |
| YRI         | REHH 1 SNP     | 33549873 | 33549873 | 3.41  | rs6925399                                                                                      |           | BAK1                                                                 |
| YRI         | REHH 1 SNP     | 33623432 | 33623432 | 3.10  | rs169737                                                                                       |           | BAK1, FLJ43752, ITPR3                                                |
| YRI         | REHH 1 SNP     | 33677872 | 33677872 | 3.00  | rs1536041                                                                                      |           | ITPR3, C6orf125                                                      |
| YRI         | REHH Haplotype | 33693913 | 33697598 | 3.11  | rs10947428,rs11967839,rs2296329                                                                |           | ITPR3, C6orf125, IHPK3                                               |
| CHB and JPT | REHH Haplotype | 33694999 | 33706327 | 3.20  | rs11967839,rs2296329,rs2281917,rs3818522                                                       |           | ITPR3, C6orf125, IHPK3                                               |
| YRI         | REHH 1 SNP     | 33694999 | 33694999 | 3.01  | rs11967839                                                                                     |           | ITPR3, C6orf125, IHPK3                                               |
| YRI         | REHH 1 SNP     | 33761636 | 33761636 | 3.11  | rs530614                                                                                       |           | C6orf125, IHPK3, LEMD2, MLN                                          |
| YRI         | REHH 1 SNP     | 33761636 | 33761636 | 3.11  | rs530614                                                                                       |           | C6orf125, IHPK3, LEMD2, MLN                                          |
